# Supplementary material
Source: PubMed Central journal article supplement (PMC4663187)
Supplement: NIHMS729071-supplement.pdf [file NIHMS729071-supplement.pdf]

Manuscript Number: BM-D-15-00682R1

Title: Estimation of material parameters from slow and fast shear waves in an incompressible, transversely isotropic material

Article Type: Full Length Article (max 3500 words)

Keywords: MR elastography; shear waves; anisotropy; transversely isotropic material; inversion algorithms

Corresponding Author: Dr. Dennis Tweten,

Corresponding Author's Institution: Washington University in St. Louis

First Author: Dennis Tweten

Order of Authors: Dennis Tweten; Ruth J Okamoto, DSc; John L Schmidt, BA; Joel R Garbow, PhD; Philip V Bayly, PhD

**Abstract:** This paper describes a method to estimate mechanical properties of soft, anisotropic materials from measurements of shear waves with specific polarization and propagation directions. This method is applicable to data from magnetic resonance elastography (MRE), which is a method for measuring shear waves in live subjects or in vitro samples. Here, we simulate MRE data using finite element analysis. A nearly-incompressible, transversely isotropic (ITI) material model with three parameters (shear modulus, shear anisotropy, and tensile anisotropy) is used, which is appropriate for many fibrous, biological tissues. Both slow and fast shear waves travel concurrently through such a material with speeds that depend on the propagation direction relative to fiber orientation. A three-parameter estimation approach based on directional filtering and isolation of slow and fast shear wave components (directional filter inversion, or DFI) is introduced. Wave speeds of each isolated shear wave component are estimated using local frequency estimation (LFE), and material properties are calculated using weighted least squares. Data from multiple finite element simulations are used to assess the accuracy and reliability of DFI for estimation of anisotropic material parameters.

Dennis J. Tweten  
Ruth J. Okamoto  
John L. Schmidt  
Philip V. Bayly  
Department of Mechanical  
Engineering and Materials  
Science  
Washington University  
Saint Louis, Missouri, 63130

TELEPHONE (314) 935-7904  
FAX (314) 935-4014  
Email: dtweten@wustl.edu

Joel R. Garbow  
Department of Radiology  
Washington University  
Saint Louis, Missouri, 63110

Dear Editor:

We are pleased to submit an **original article** entitled “Estimation of material parameters from slow and fast shear waves in an incompressible, transversely isotropic material” for review to the Journal of Biomechanics. This paper describes a method to estimate mechanical properties of soft, anisotropic materials from measurements of shear waves consistent with magnetic resonance elastography (MRE).

All five authors have made substantial contributions to all of the following: (1) the conception and design of the study and the analysis and interpretation of data, (2) drafting the article or revising it critically for important intellectual content, (3) final approval of the version to be submitted.

The manuscript, including related data, figures and tables has not been previously published and is not under consideration elsewhere.

Thank you for your consideration.

With best regards,

Dennis Tweten  
Ruth J. Okamoto  
John L. Schmidt  
Philip V. Bayly  
Joel R. Garbow

## \*Referee Suggestions

### Referee Suggestions:

Armando Manduca  
Department of Physiology and Biomedical Engineering  
Mayo Clinic  
200 First St SW  
Rochester, MN 55905  
Email: manduca.armando@mayo.edu

Thomas Royston  
The Department of Mechanical & Industrial Engineering (M/C 251)  
University of Illinois at Chicago  
2039 Engineering Research Facility  
842 W. Taylor Street  
Chicago, Illinois 60607  
Email: troyston@uic.edu

Kathy Nightingale  
Department of Biomedical Engineering  
Duke University  
277 Hudson Hall Annex  
Durham, NC 27708  
Email: kathy.nightingale@duke.edu

Manuscript BM-D-15-00682, Tweten et al.

**Response to review of Manuscript No. BM-D-15-00682:** DJ Tweten et al. *Estimation of material parameters from slow and fast shear waves in an incompressible, transversely isotropic material* *Journal of Biomechanics*

We thank the editor and reviewers for their thoughtful evaluation of our manuscript. We appreciate both their generally positive assessment and their constructive critiques and suggestions. Below we respond point-by-point to the reviewers' comments, and indicate corresponding revisions to the manuscript. In particular, we added noise to all of the simulations and made a comparison between estimates with and without noise for the global approach. The effects of damping in the FE simulations are addressed, and we discuss the general issue of damping in the material model. The explanation of DFI is now improved with more detail and a new appendix is added (Appendix B) to discuss the details of the inversion approach. Finally, we provide a comparison of our approach to the one introduced by Guo et al.

### Responses to Referees' Comments to Authors:

#### Reviewer 1

**Comment 1:** *One major concern is that the majority of the performance analysis of the algorithm is based on noise-free data. With MRE data being inherently noisy, it would be more useful to see how well this algorithm performs in the presence of statistically well-quantified noise that is comparable in level to reality.*

**Response:** Agreed. We have added noise resulting in an SNR of 10 to all simulations. A comparison between the noise free and noisy data for the global approach is made in Table 2. We have quantified the noise in at the end of section 2.3 (line 196).

**Comment 2:** *To me, another major oversight is the lack of any mention of damping/viscous properties and their role in all of this. The simulation results suggest that damping was included; but, there is no discussion of this. As I'm sure the authors are aware, the choice and identification of appropriate rheological models is also critical and intertwined with the choice and identification of the purely elastic properties. In simulations without realistic damping one runs the risk of all kinds of standing wave patterns, mode conversions and propagating wave types that, in reality, won't be there or may become evanescent because of viscosity. What was done in these simulations? How does it compare to reality?*

**Response:** We agree that the effect of damping should be addressed in the manuscript. We used an isotropic loss factor of 0.2 in all of the simulations which is now mentioned in the text. A comparison between this value and loss factors calculated from MRE studies is also now included in the text (line 186): "For all cases we used an isotropic loss factor of  $\eta=0.2$ , which is similar to ranges ( $0.23<\eta<0.93$ ) found for the human brain using MRE (Bayly2014), ( $0.11<\eta<0.23$ ) for gelatin using MRE (Okamoto2011), and qualitatively similar in turkey breast ex vivo using MRE (Schmidt2015 a,b)."

In the text, we have also addressed the reason we chose not estimate the viscoelastic terms and how those terms could be estimated in the future (line 170): "It should be noted that we did not attempt to estimate dissipative viscoelastic terms (complex moduli, loss factors, or damping ratios) in this study. These terms were neglected in order to focus on the underlying relationship between transversely isotropic elastic parameters and slow and fast shear waves. This choice enabled us to use a simple, efficient wavelength estimation method: LFE. LFE-based methods are limited in that information on dissipation is not estimated without modification (Clayton2013). In principle, the directionally filtered

approach could be combined with another method such as direct inversion (Oliphant2001) to estimate viscoelastic parameters in addition to  $\mu$ ,  $\phi$ , and  $\zeta$ ."

**Comment 3:** (2: Methods section, Figure 2):  $\theta$  is used to describe the angle between the shear wave propagation direction and the fiber orientation, and the angle between the slow shear wave displacement plane and the xy plane. This should be two unique variables. Also, if the angle of the displacement plane of the slow shear wave has no effect on the slow shear wave speed, why show the variable at all? And, what about the fast shear wave displacement plane? Why does this not have an orientation angle from the xz plane if the slow shear wave does? Please clarify this by being more consistent or explaining that the displacement plane has no effect on the propagation speed.

**Response:** The concept of shear wave polarization we try to explain in Figure 2 is difficult to depict in a 2D figure. However, we have taken the reviewer's comments and modified the plot and caption to be clearer. First, the annotation of the angle  $\theta$  has been moved as suggested. Secondly, the intent of the planes is to make the directions of the polarizations clear. The displacement field due to shear waves travelling in an ITI material can be decomposed into slow and fast waves, which have different polarization directions which are orthogonal to each other and orthogonal to the propagation direction (note Eq. 1 & 3). Each plane is completely defined by the polarization and propagation directions. Displacements in the direction of the fast polarization stretch the fibers (or more generally, stretch the material in its stiffest direction), which leads to faster wave speeds (relative to waves in which fibers are not stretched). With this in mind, the planes have been labeled "Plane of Displacement." Finally, the caption has been changed to indicate that a single displacement field is analyzed, and the isolated slow and fast shear wave components are being displayed in the figures a) and b).

CAPTION: "A displacement field with a single propagation direction,  $\vec{n}$ , at an angle  $\theta$  from the fiber direction,  $\vec{a}$ , can be decomposed into two shear waves, (a) "slow" and (b) "fast" with different polarization directions. This is illustrated for the case in which the fiber direction is aligned with the x-axis. (a) The displacements of the slow shear wave are in the  $\vec{m}_s$  polarization direction which lies in the shaded plane. (b) The displacements of the fast shear wave are in the  $\vec{m}_f$  polarization direction which lies in the shaded (xz) plane. Note that the wavelength of the fast shear waves is longer than that of the slow shear wave for the same frequency."

**Comment 4:** (2.2.1: Isolation of wave components section) Vector projection: how did you determine the polarization direction of the slow and fast wave? And if you use an arbitrary polarization direction for one of the waves (slow wave for example), did you use a perpendicular polarization direction for the other wave?

**Response:** The polarization directions are completely defined by the fiber direction and propagation direction using equations 1 & 3. We added the following statement to the text to help clarify this (line 113):

"The polarization directions are determined using Eq. (1) and (3). While the arbitrary propagation direction,  $\vec{n}$ , may be selected, the fiber direction,  $\vec{a}$ , must be known a priori using diffusion tensor imaging (DTI) (Romano2012) or other suitable method."

**Comment 5:** (2.2.1: Isolation of wave components section) Directional filter in Fourier space: what are the cut off frequencies or how did you determine the cut off frequencies? From Figure 4, the wavelength ratio between the fast and slow shear waves looks like around 0.5; so, only if the slow and fast wave are already isolated, otherwise, you need to use a very narrow bandwidth of the spatial filter to isolate these two waves, and in that case, the result would be not that reliable.

**Response:** The slow and fast shear waves are isolated using a dot product between the total displacement field and the slow and fast polarization directions, respectively. The filtering in Fourier space is used to isolate a particular direction, which can be performed after the slow and fast shear waves have been isolated. The text was re-written to make this clear (line 110): “The first step is vector projection, in which the slow and fast shear waves are isolated by performing a dot product between the displacement field and the normalized slow and fast polarization directions, respectively.”

**Comment 6:** (2.2.1: Isolation of wave components section) *With what criteria or method did you determine the arbitrary set of propagation directions and how many directions in the set? Also, are these directions limited to one slice? This raises another question: is this approach workable on 2D data or restricted to 3D data only?*

**Response:** We typically start with a set of propagation directions equally spaced in 3D that is dense enough to capture the energy in the wave field. Then, a specialized set can be defined, which is limited to directions with large displacement amplitudes. Neither method is currently guaranteed to be optimal. In the future, we plan to explore the selection of these sets in more detail. The method can be used in 2D, although we don't present any of those results in this manuscript. In light of these questions, we modified the text to include the following statement (line 118): “In principle, any arbitrary set of propagation directions may be chosen for the analysis, such as an equally spaced 3D set or a set containing directions with large amplitudes such as the one shown in Fig 5d. Creating a set of propagation directions with large amplitudes typically requires an iterative approach.”

**Comment 7:** (2.2.2: Wave speed estimation) *What were the filter properties of the LFE that were used to estimate the wave speed?*

**Response:** We added the following sentence to provide the LFE parameters (line 129): “We used the LFE parameters  $\rho_0=1$  for the center frequency and  $N=11$  for the number of filters”

**Comment 8:** (2.3: Simulation Approach) *What was the damping material properties applied to the COMSOL model? Table 1 only lists real valued material properties, which wouldn't produce the attenuated waves seen in the wave displacement images. How did you handle wave reflections at the outer boundary? It would also be nice to know some details about the mesh and model thickness.*

**Response:** We agree that the finite element details are important to include in the manuscript, and details have been added about the isotropic loss factor used in the finite element model as well as the Young's modulus, Poisson's ratios, dimensions, mesh details, and boundary conditions (line 190). The directional filter approach (Fourier-space filter) separates reflections from waves travelling in the opposite direction, so there are no overlapping displacements.

**Comment 9:** (line 106) *Can you provide a reference for the wavelet analysis in estimating wave speeds?*

**Response:** We added the reference to Kingsbury2001 which describes an approach for complex wavelets which could be used to estimate the wavenumber of shear waves (line 126).

**Comment 10:** (2.2.4: Material parameter estimation) *"material parameters can be estimated from Eq (2) and Eq (4)". There are three unknown parameters, but two equations, and you mentioned "valid speed estimates for both types of shear waves must be available for a range of propagation directions". So, did you use iterative substitution to estimate the parameters or use a curve fitting?*

**Response:** Ideally, multiple wave speeds and directions will be used to estimate the three material parameters which is an over-constrained problem, as the reviewer points out. We have chosen a weighted least squares (WLS) approach to take advantage of multiple estimates. The details of this

approach, including how Eqs. 2 & 4 are implemented with WLS, is now added in the new Appendix B (pg. 19).

**Comment 11:** (2.3: Simulation Approach) *Can you add what software you use for the simulation? You mention Comsol in the caption of figure 5, but it'll be better to have it in the manuscript body.*

**Response:** We now mention in the text that Comsol was used for the simulations (line 179).

**Comment 12:** (2.3: Simulation Approach) *The  $\langle \mu \rangle$  defined in the simulation, is it the shear modulus? If yes, shouldn't it be a complex number considering the attenuation? What value of Poisson's ratio did you use for the simulation?*

**Response:** We agree that we should include the implementation of the material parameters in the finite element model and regret the omission of these details. We used a real shear modulus and an isotropic loss factor ( $\eta=0.2$ ) so that the complex modulus is effectively  $\mu^*=\mu(1+i\eta)$ . Other moduli are also complex as defined by the shear anisotropy and tensile anisotropy ratios. The Young's moduli and Poisson's ratios (see below) are now in the text. (line 190)

$$E_1 = \mu^*(4*\zeta + 3); \quad E_2 = E_1 / (1 + \zeta)$$

$$v_{12} = 0.49; \quad v_{21} = v_{12} * E_2 / E_1; \quad v_{23} = 1 - v_{21} - 0.01$$

**Comment 13:** (3. Results) *Please explain why local material parameter estimates were only presented for case 1.*

**Response:**

The local approach tends to limit the range of propagation directions (available information) that is used in the inversion. For a homogeneous region, using the entire volume is the best practice, since it includes data from the greatest possible number of directions. Great care should be taken in a local approach to ensure that both slow and fast shear waves of sufficient amplitude (good SNR) in multiple propagation directions are present. For this reason, we have focused on the global approach in this manuscript and included local results for only a single case. The results for case 1 are typical of the other cases (we now mention this in the manuscript – line 214). Also, we agree that the paper should mention why only one case was selected for the local approach. The text now includes the following statements:

“The results highlight the effect of the typical limited number of directions in a relatively small kernel, which reduces the accuracy of the inversion. For a homogeneous region, increasing the kernel size to the total volume will typically give the best results. Great care should be taken in a local approach to ensure that both slow and fast shear waves of sufficient amplitude (good SNR) in multiple propagation directions are present. Therefore, we have chosen to focus on the global approach in this paper and have only included results for the local approach for Case 1.” (line 222)

“Adding multiple experiments with different modes of excitation or fiber directions to the estimation process should increase the available information and lead to more accurate estimates especially in the local approach in which information tends to be more limited than the global approach.” (line 286)

**Comment 14:** (3. Results) *Figure 6: Why is there no case 2 shown?*

**Response:** Since case 2 has the same analytical curve as case 1, we originally had chosen not to include it for clarity. We agree it makes sense to include the intermediate results for all four cases. After some experimentation with symbols, figure 6 now includes case 2 with a reasonable amount of clarity.

**Comment 15:** (3.2. Local Parameter Estimates) *I would suggest adding noise to the local case as well; this would give a better idea of how well the algorithm will work. Also, I would suggest presenting spatially averaged  $\mu$ ,  $\phi$ , and  $\zeta$  values for comparison to the model input parameters.*

**Response:** We agree that adding noise to the local case is more realistic. We added the same level of noise (SNR=10) as the global case. Fig. 7 now includes a comparison of the W-Disp. field with and without additive noise to give an intuitive idea of the level of noise. We also agree that spatially averaged material parameters for the local case would add to the text. These values are  $\mu=986\pm 56$ ,  $\phi=0.92\pm 0.23$ , and  $\zeta=1.57\pm 0.23$ , and are now included in the text (line 221).

**Comment 16:** (3.3. Global Parameter Estimates) Figure 8: Why was noise only applied to case 1? Why not also test the other cases with noise since adding noise makes the simulation more representative of noisy MRE data? It is also very difficult to see what are the actual estimated values. Please add a table with the precise estimated parameter values and their standard deviations.

**Response:** We agree that adding noise to all cases for the global approach is more realistic and have done so. Also, we have replaced Fig. 8 with Table 2 which gives the values of the estimated values more precisely. Table 2 compares the actual values, estimated values without noise, and estimated value with noise for each case.

**Comment 17:** (4. Discussion, Line 230) What is meant by comparable? Looking at Figure 8 it seems that the noise case is not as accurate as the case of noise-free. Please, give a more specific statement in regards to how well the noise case is as compared to the noise-free case.

**Response:** This statement has been removed from the text. We have now added Table 2 which provides a detailed comparison of all four cases with and without noise.

**Comment 17:** (Appendix A, Line 280) Eq. (A.?), it is not clear which equation is being referenced.

**Response:** This typo has been fixed, and the reference is now properly included as Eq. A.2 (line 329).



## Reviewer 2

**Comment 1:** *Does your method require a-prior information on the fiber direction? You say on lines 96ff that you select the fast and slow component which is defined relative to the fiber direction. However, how would you know the fiber direction in reality? Would you need DTI information on the fiber direction similar to Romano et al?*

**Response:** This is a good point. The fiber direction must be known a priori, and in practice this would require using DTI to determine the fiber direction. We now mention this explicitly in the text along with a reference to Romano et al. (line 113).

**Comment 2:** *How do you decide if a wave speed recovered by LFE corresponds to the fast or slow component? Do you use different filters for both wave speed components? Overall, the information on the LFE procedure is very sparse and should be better provided within the manuscript.*

**Response:** We agree that the manuscript should provide more details regarding the DFI approach, and have added a number of changes in Section 2. In particular, section 2.2.1. has been improved to make a clearer explanation of how components are separated. Slow and fast shear waves are isolated using a dot product between the total displacement field and the slow or fast polarization direction, respectively. The polarization directions are determined knowing the fiber direction, picking a propagation direction, and using Eqs. 1 & 3. To isolate the direction, the Fourier-space filter is applied to the result of either dot product. The Fourier-space filter is not used to distinguish between the slow and fast shear waves.

**Comment 3:** *How do you calculate three parameters from two wave speeds? Please give more information on this. Do you combine information of neighbored pixels or of multiple directions?*

**Response:** The reviewer is correct. Multiple wave speeds and directions must be used to estimate the three material parameters, which leads to an over-constrained problem. We have chosen a weighted least squares (WLS) approach to take advantage of multiple estimates. The details of this approach, including how Eq. 2 & 4 are implemented with WLS, is now added in the new Appendix B. Section 2.2.4. describes two possible implementations for including voxels in the WLS approach. In the global approach, any subset of voxels in a homogeneous volume may be used, while in the local approach all voxels within a specified radius of a center voxel are used.

**Comment 4:** *Did you add noise to the simulated wave fields? If not, the validation of your approach is questionable and should be revised by adding noise. If yes, give the SNR in table 1.*

**Response:** We agree that noise should be added to the simulations for comparison. We have added noise resulting in an SNR of 10 to all simulations. A comparison between the noise free and noisy data is made in Table 2. We have quantified the noise in section 2.3 (line 196).

**Comment 5:** *What is the advantage of your method as compared to the curl-based three-parameter inversion of Guo et al? Please discuss!*

**Response:** The recent paper by Guo is in agreement with our general approach- that three elastic parameters are necessary and sufficient to describe an ITI elastic material. The current paper focuses on (1) the physical phenomena of slow and fast shear waves, (2) the implications for measurement and inversion, and (3) a directional filter-based approach that has a less stringent requirement for incompressibility and requires fewer numerical derivatives.

- (1) Most importantly, both the approach of Guo et al. and the one we present in the manuscript require the presence of both slow and fast shear waves in the displacement field to accurately estimate all three material properties. However, in some cases, there may not be enough

information to estimate all three parameters. This could occur when one of the shear waves is missing (e.g. the cylinder excitation example given below in the response to comment 9, in which the fiber direction is in the  $xy$ -plane), or if the number of estimates for one shear wave far exceed the number of the other type of shear wave (e.g. 95% of the shear wave estimates are the slow variety).

The previous work of Guo et al. does not provide a way to explicitly check that both slow and fast shear waves propagating in multiple directions contribute to the displacement field. In the approach we present in the manuscript, however, we explicitly require that there are contributions from both slow and fast shear waves from multiple directions in every estimate, which is necessary to make sure there is enough information to accurately estimate all three parameters. Any estimate which does not have a specified minimum percentage of either shear wave component can be rejected.

We note that this capability can certainly be added to the approach of Guo et al., but that this is a specific contribution of the present study.

- (2) The derivation by Guo et al. assumes incompressibility, a priori, in the derivation of the equations used for direct inversion. This may be limiting because the range of parameters (e.g. bulk modulus) for which the incompressible assumption is valid cannot be determined. In contrast, for the method we present in the manuscript, we develop the acoustic equations first (Eq. A.8.) and then apply the incompressibility assumptions. This allows us to evaluate the effect of bulk modulus  $\kappa$  on the speed of the slow and fast shear waves (Fig. 3). Knowing this relationship allows us to determine the range of bulk modulus for which the incompressibility assumption is reasonable ( $\kappa/\mu > 100$ ; line 100).
- (3) The approach presented by Guo et al. works on the curl field which requires an extra derivative, which typically makes a method more sensitive to noise and choice of filter parameters. The approach we present in the manuscript is applied directly to the displacement field.
- (4) Finally, our approach has been characterized by estimating parameters from data generated by simulations in which the parameters are known (i.e., a “gold standard” is available). To our knowledge the approach used by Guo et al. has not yet been validated on simulated data, nor on a material with known parameters, so its accuracy is not yet known.

We have updated the text to take into account items (1) through (3) above. In addition, we have added a reference to the full paper by Guo et al. (line 27):

“Guo et al (2015) have recently published a method to estimate three material parameters for an ITI material from the curl of a displacement field measured by MRE. In their material model, Guo et al. (2015) assume incompressibility, a priori, in the derivation of the equations used in the inversion. The estimation approach introduced by Guo et al. (2015) requires taking the curl of the displacement field and does not explicitly require that both slow and fast shear waves are included for inversion. The paper of Feng2013 et al. includes the derivation of inverse equations before applying the incompressibility assumption, which can be used to determine ranges of the bulk modulus for which the approach is valid. Feng2013 et al. demonstrate how the compliance tensor with the incompressibility approximation can be used to find expressions for Young's moduli, shear moduli, and Poisson's ratios.”

“The proposed method explicitly requires both slow and fast shear waves for a valid material parameter estimate and can be performed directly on the displacement field.” (line 58)

**Comment 6:** *(Abstract) say that you aim at three-parameter inversion*

**Response:** We agree that the abstract should clearly indicate we are estimating three parameters. We have modified the following line in the text: “A three-parameter estimation approach based on directional filtering and isolation of slow and fast shear wave components (directional filter inversion, or DFI) is introduced.”

**Comment 7:** *(Abstract) MRE is already 20 years old which is not 'recent'*

**Response:** Agreed. We have removed ‘recent’ from this line.

**Comment 8:** *(Introduction) you say on line 34ff that Romano et al used the most complete TI-model, however, in the cited paper the full orthotropic tensor is deduced and TI-properties are revealed by redundancies in the tensor elements.*

**Response:** Agreed. We have updated the text to include the following line (line 41): “A nine-parameter, orthotropic material model is assumed, and the five independent components of the transversely isotropic material model are revealed through redundancies.”

Also we have modified the sentence pointed out to now state (line 44): “This material model used by Romano et al. (2012) captures both shear and pressure waves and does not require the assumption of near-incompressibility.”

**Comment 9:** *(Methods) you say on line 73 fast shear wave stretches the fibers. However, at  $\theta = 0$ , the fast shear wave propagates along the fibers (without stretching them) with the same speed as the slow wave.*

**Response:** The  $\theta=0$  condition is the degenerate case in which only the slow shear wave is present. This is an important point, since it is possible to set up an experiment in which only slow shear waves are present. If the cylinder setup used in the manuscript had a fiber direction constrained to the xy-plane ( $\beta=0^\circ$ ), only slow shear waves would be present. In such a case the parameter  $\zeta$  could not be estimated. We have updated the following line in the text (line 94): “Note for the degenerate cases of  $\theta=0^\circ$  and  $\theta=90^\circ$ , only the slow shear wave is present.”

**Comment 10:** *(line 143) 'each each'*

**Response:** This typo is now fixed.

**Comment 11:** *(Appendix A) in your equation of motion (A6)  $\text{div}(\sigma)$  is on the left hand side. Do you mean  $\text{gradient}(\sigma)$ ?*

**Response:** We apologize for the confusion regarding this term. The text has been updated indicating that sigma is a second order stress tensor, so that is now clear that  $\text{div}(\sigma)$  is the appropriate term for this case. (line 320)

# Estimation of material parameters from slow and fast shear waves in an incompressible, transversely isotropic material

Dennis J. Tweten<sup>a,\*</sup>, Ruth J. Okamoto<sup>a</sup>, John L. Schmidt<sup>a</sup>, Joel R. Garbow<sup>b</sup>, Philip V. Bayly<sup>a,c</sup>

<sup>a</sup> *Department of Mechanical Engineering and Materials Science, Washington University, St. Louis, MO, USA*

<sup>b</sup> *Department of Radiology, Washington University, St. Louis, MO, USA*

<sup>c</sup> *Department of Biomedical Engineering, Washington University, St. Louis, MO, USA*

---

## Abstract

This paper describes a method to estimate mechanical properties of soft, anisotropic materials from measurements of shear waves with specific polarization and propagation directions. This method is applicable to data from magnetic resonance elastography (MRE), which is a method for measuring shear waves in live subjects or in vitro samples. Here, we simulate MRE data using finite element analysis. A nearly-incompressible, transversely isotropic (ITI) material model with three parameters (shear modulus, shear anisotropy, and tensile anisotropy) is used, which is appropriate for many fibrous, biological tissues. Both slow and fast shear waves travel concurrently through such a material with speeds that depend on the propagation direction relative to fiber orientation. A three-parameter estimation approach based on directional filtering and isolation of slow and fast shear wave components (directional filter inversion, or DFI) is introduced. Wave speeds of each isolated shear wave component are estimated using local frequency estimation (LFE), and material properties are calculated using weighted least squares. Data from multiple finite element simulations are used to assess the accuracy and reliability of DFI for estimation of anisotropic

---

\*Corresponding author at: Washington University in Saint Louis, Department of Mechanical Engineering and Materials Science, Campus Box 1185, One Brookings Drive, Saint Louis, Missouri 63130, USA. Tel.: + 1 314 935 7904 fax: + 1 314 935 7904

*Email address:* dtweten@wustl.edu (Dennis J. Tweten)

material parameters.

*Keywords:* MR elastography, shear waves, anisotropy, transversely isotropic material, inversion algorithms

---

## 1. Introduction

Magnetic resonance elastography (MRE) is an innovative method for non-invasive estimation of material parameters of living biological tissue, including in human subjects. In MRE, shear waves are introduced by external vibration at a specific frequency and the resulting displacement fields are visualized by motion-sensitive MR imaging sequences. Material parameters are estimated from the wavelengths (hence speed) of shear wave components in the tissue. Recent studies using MRE have been performed to estimate the material properties of a wide range of tissue including the liver (Klatt et al. (2010a); e.g.), skeletal muscle (Klatt et al. (2010b); Papazoglou et al. (2006); e.g.), and brain (Green et al. (2008); Clayton et al. (2011); e.g). While in many studies an isotropic material is assumed, biological tissue is often anisotropic, which requires more sophisticated material models.

Recently, researchers have proposed anisotropic material models with two (Qin et al., 2013; Sinkus et al., 2005), three (Guo et al., 2015; Feng et al., 2013; Namani and Bayly, 2009; Papazoglou et al., 2006), and five or more (Romano et al., 2012) elastic parameters. Each of these models assumes a transversely isotropic or orthotropic material undergoing small elastic or viscoelastic deformations, which are appropriate assumptions for MRE of many soft anisotropic tissues. For both two-parameter models (Qin et al., 2013; Sinkus et al., 2005), the material is assumed to be nearly incompressible, which simplifies the model so that analytical expressions for wave speed can be found. As a further simplification, only shear anisotropy is considered, in which the effect of

20 stretching the fiber is ignored. The two-parameter model implies a single shear wave mode (slow)  
21 whose speed varies with direction.

22 For the three-parameter models (Guo et al., 2015; Feng et al., 2013), both shear and tensile  
23 anisotropies are taken into account. Tensile anisotropy accounts for the effect of fiber stretching and  
24 is the basis of the distinction between slow and fast shear waves. While the three-parameter model is  
25 unable to describe pressure waves in a material, for nearly incompressible materials such as many soft  
26 tissues, the assumption of incompressibility allows accurate predictions of isochoric deformations.  
27 Guo et al. (2015) have recently published a method to estimate three material parameters for an  
28 ITI material from the curl of a displacement field measured by MRE. In their material model,  
29 Guo et al. (2015) assume incompressibility, a priori, in the derivation of the equations used in  
30 the inversion. The estimation approach introduced by Guo et al. (2015) requires taking the curl  
31 of the displacement field and does not explicitly require that both slow and fast shear waves are  
32 included for inversion. The paper by Feng et al. (2013) includes the derivation of inverse equations  
33 before applying the incompressibility assumption, which can be used to determine ranges of the  
34 bulk modulus for which the approach is valid. Feng et al. (2013) demonstrate how the compliance  
35 tensor with the incompressibility approximation can be used to find expressions for Young's moduli,  
36 shear moduli, and Poisson's ratios.

37 Romano et al. (2012) introduced a spatial-spectral filter in order to identify five viscoelastic  
38 material parameters from MRE data. Combined with Helmholtz Decomposition (Romano et al.,  
39 2012, 2005), shear and pressure waves are separated within a waveguide in which fibers follow a  
40 known path. Wave speeds estimated in a local reference frame relative to the waveguide are then  
41 used to estimate material properties. A nine-parameter, orthotropic material model is assumed, and  
42 the five independent components of the transversely isotropic material model are revealed through

43 redundancies.

44 This material model used by Romano et al. (2012) captures both shear and pressure waves and  
45 does not require the assumption of near-incompressibility. However, the model is described in terms  
46 of the stiffness tensor rather than the compliance tensor which greatly increases the complexity of  
47 the estimation problem. In a nearly incompressible material, the speed of the pressure waves tend  
48 to be orders of magnitude larger than the speed of the shear waves; corresponding elements of the  
49 stiffness matrix may also differ by orders of magnitude.

50 A phenomenon specific to anisotropic elastic or viscoelastic media is the concurrent existence  
51 of slow and fast shear waves, which can be exploited to estimate material properties. The three-  
52 parameter model (Feng et al. (2013), e.g.) is the simplest approach that captures both shear  
53 waves. In this paper, we develop and demonstrate a method to identify the three incompressible,  
54 transversely isotropic (ITI) material parameters using a directional filter inversion (DFI) approach.  
55 The DFI method separates the slow and fast shear waves by projecting onto the corresponding  
56 polarization vectors and using directional filters similar to the spatial-spectral filters introduced by  
57 Romano et al. (2012). However, in the DFI approach, arbitrary propagation directions are used  
58 with the separated slow and fast shear waves to isolate specific components. The proposed method  
59 explicitly requires both slow and fast shear waves for a valid material parameter estimate and can  
60 be performed directly on the displacement field. In this study, we analyzed simulated data to assess  
61 the ability of DFI to estimate shear wave speeds and material properties.

## 62 **2. Methods**

63 We first demonstrate that, in general, harmonic excitation at frequencies typical of MRE in an  
64 ITI material results in both slow and fast shear waves. Next, we present the DFI method which

65 uses both slow and fast shear waves to estimate the three ITI material parameters. We describe the  
 66 simulation approach, based on a motivating physical experiment, and show how it is used to assess  
 67 the accuracy and reliability of this approach.

68 *2.1. Theory of Shear Waves in an Incompressible, Transversely Isotropic Elastic Material*

69 This section presents the basic concepts underlying shear wave behavior in a fibrous material.  
 70 (Appendix A includes a derivation of the equations described below.) We start with a linear, elastic,  
 71 ITI material model (a fiber reinforced isotropic substrate), as shown in Fig. 1. Typically, both the  
 72 tensile modulus in the fiber direction and the shear modulus in planes parallel to the fibers are  
 73 stiffened, as highlighted in Fig. 1b and Fig. 1d, respectively. Rather than seeking the elements  
 74 of the elasticity matrix, it is convenient to use the substrate shear modulus  $\mu$ , shear anisotropy  
 75  $\phi = \mu_1/\mu - 1$ , and tensile anisotropy  $\zeta = E_1/E_2 - 1$  as the three material parameters.

76 Consider a shear wave traveling in an ITI material with an arbitrary propagation direction  $\vec{n}$  at  
 77 an angle  $\theta$  from the fiber direction  $\vec{a}$  such as the one shown in Fig. 2. The displacement of this shear  
 78 wave can be polarized into independent slow and fast shear wave components. The polarization  
 79 direction of the slow shear wave is given by (Appendix A)

$$\vec{m}_s = \vec{n} \times \vec{a}, \tag{1}$$

80 which occurs in a direction perpendicular to both the propagation direction and the fiber direction.  
 81 The normalized vector is given by  $\hat{m}_s = \vec{m}_s/|\vec{m}_s|$ , which is used for all dot products. Because the  
 82 slow shear wave does not stretch the fibers, the speed of the slow shear wave only depends on the  
 83 shear anisotropy and is given by

$$c_s^2 = \frac{\mu}{\rho} (1 + \phi \cos^2(\theta)) , \tag{2}$$



84 On the other hand, from the polarization direction of the fast shear wave given by

$$\vec{m}_f = \vec{n} \times \vec{m}_s, \quad (3)$$

85 and the speed of the fast shear wave given by

$$c_f^2 = \frac{\mu}{\rho} (1 + \phi \cos^2(2\theta) + \zeta \sin^2(2\theta)) . \quad (4)$$

86 The normalized vector is given by  $\hat{m}_f = \vec{m}_f/|\vec{m}_f|$ , which is used for all dot products. It is clear that  
87 the fast shear wave stretches the fiber and that its speed is dependent on the tensile anisotropy.  
88 The result is two independent shear wave components traveling in the same direction at different  
89 speeds.

90 To illustrate the differences between the slow and fast shear wave speeds due to tensile anisotropy,  
91 consider the plots in Fig. 3 of wave speed versus tensile anisotropy. The slow shear wave speed in  
92 Fig. 3a is independent of  $\zeta$ , since the slow shear wave speed does not depend on tensile anisotropy.  
93 However, the speed of the fast shear wave does increase for larger values of tensile anisotropy as  
94 shown in Fig. 3b. Note for the degenerate cases of  $\theta = 0^\circ$  and  $\theta = 90^\circ$ , only the slow shear wave is  
95 present.

96 One of the critical assumptions of an ITI material model is incompressibility, in which the bulk  
97 modulus  $\kappa$  approaches infinity. To see the effects of this assumption, consider Fig. 3 in which the  
98 fast shear wave and pressure wave speeds in a nearly-incompressible transversely isotropic (NITI)  
99 material are plotted versus bulk modulus,  $\kappa$ , and tensile anisotropy,  $\zeta$ . Figure 3c shows that for  
100 even a relatively small ratio of bulk modulus to shear modulus ( $\kappa/\mu = 100$ ), the speed of the fast  
101 shear wave is already approaching the incompressible case. The slow shear wave speed is unaffected  
102 by the bulk modulus. In addition, in this nearly-incompressible material, the pressure wave speed  
103  $c_p$  is much larger than the speed of either shear wave as shown in Fig. 3d.

## 104 2.2. Directional Filter Inversion

105 For an ITI material with a known displacement field, the three parameters can be estimated if  
106 the slow and fast shear waves in multiple directions can be isolated and the speeds of the waves  
107 estimated. This is the fundamental concept behind the DFI method. Figure 4 outlines the steps  
108 used in DFI to identify the speed of slow and fast shear waves.

### 109 2.2.1. Isolation of wave components

110 The input to DFI is a harmonic displacement field such as one generated in MRE. The first step  
111 is vector projection, in which the slow and fast shear waves are isolated by performing a dot product  
112 between the displacement field and the normalized slow and fast polarization directions, respectively.  
113 The polarization directions are determined using Eq. (1) and (3). While the arbitrary propagation  
114 direction,  $\vec{n}$ , may be selected, the fiber direction,  $\vec{a}$ , must be known a priori using diffusion tensor  
115 imaging (DTI) (Romano et al., 2012) or other suitable method. Next, the propagation direction,  
116  $\vec{n}$ , is isolated by filtering the polarized data in Fourier space (Manduca et al., 2003). The resulting  
117 directionally filtered dataset consists of an independent displacement field for either the slow and  
118 fast shear wave in an arbitrary propagation direction. In principle, any arbitrary set of propagation  
119 directions may be chosen for the analysis, such as an equally spaced 3D set or a set containing  
120 directions with large amplitude contributions such as the one shown in Fig. 5d. Creating a set of  
121 propagation directions with large amplitudes typically requires an iterative approach. The process  
122 is repeated for all propagation directions in the set, for both slow and fast shear waves.

### 123 2.2.2. Wave speed estimation

124 We use the well-established local frequency estimation (LFE) (Knutsson et al., 1994) method  
125 to estimate wave speeds. However, other approaches to estimate wave speeds such as wavelet

126 analysis (Kingsbury, 2001) can also be used. In addition to wave speed, LFE also provides a  
127 measure of the variance of the speed estimate at each voxel (Okamoto et al., 2014; Knutsson et al.,  
128 1994), which they call “certainty.” This value may be useful for assessing confidence in wave speed  
129 estimates for parameter identification. We used the LFE parameters  $\rho_0 = 1$  for the center frequency  
130 and  $N = 11$  for the number of filters (Okamoto et al., 2014).

### 131 *2.2.3. Inclusion criteria*

132 The main complication in estimating wave speeds for each direction is that a displacement field  
133 may not include significant slow and fast shear wave components at every location. For example,  
134 consider the filtered displacement fields in Fig. 4, which highlight directionally filtered wave fields  
135 that fill a subset of the domain. LFE and other techniques return wave speed estimates for the  
136 entire domain, including regions with little displacement. In addition, directional filters are not  
137 ideally narrow or selective. Therefore, wave speed estimates must be carefully selected before being  
138 included in parameter identification. In this study, we use three selection criteria: (i) amplitude of  
139 the corresponding shear wave component, (ii) LFE “certainty,” and (iii) rejection of outlying wave  
140 speed estimates.

141 (i) For the amplitude threshold, the magnitude of the filtered displacement at a particular voxel  
142 must be larger than a specified fraction of the median amplitude of the unfiltered field. The  
143 resulting mask eliminates voxels in which the amplitude of the specified shear wave is too low  
144 for an accurate wave speed estimate.

145 (ii) The certainty threshold results in a mask in which the variance of wave speed estimates is  
146 relatively low, based on LFE. A certainty of one corresponds to a low variance, and a certainty  
147 of zero corresponds to a large variance.

148 (iii) The mean and standard deviation of the remaining wave speeds are then calculated in order to  
149 create a mask that eliminates wave speeds one standard deviation above and below the mean.  
150 This final step is a simple approach that is effective in removing artifacts from imperfect  
151 directional filtering.

#### 152 *2.2.4. Material parameter estimation*

153 Next, material parameters can be estimated from Eq. (2), Eq. (4), and the wave speed. To  
154 estimate all three parameters, valid speed estimates for both types of shear waves must be available  
155 for a range of propagation directions. Therefore, estimates of material properties are improved by  
156 combining multiple voxels that include waves with a variety of propagation directions. For a local  
157 inversion, which results in an estimate centered at each voxel, a kernel or sphere of voxels is selected  
158 to be included in the fitting process. The estimated material properties are then assigned to the  
159 voxel at the center of the kernel. For a global inversion, all voxels within a region are assumed to  
160 have uniform material properties, and consequently, any subset of the voxels may be used for the  
161 inversion.

162 In this paper, we use the weighted least squares approach to estimate the material parameters  
163 for both local and global inversion methods (see Appendix B for more details). The weights are  
164 the relative displacement amplitudes at each voxel for a particular propagation direction and po-  
165 larization. At least two propagation directions with different angles  $\theta$  from the fiber direction are  
166 required for a valid inversion. Parameter estimates are retained using a selection criteria based on  
167 the coefficient of determination or R value. For the local inversion, voxels with a R value greater  
168 than the mean of the non-zero R values are kept. For the global inversion, only estimates above 0.95  
169 of the mean of the non-zero R values are included in the average estimated material parameters.

170 It should be noted that we did not attempt to estimate dissipative viscoelastic terms (complex  
171 moduli, loss factors, or damping ratios) in this study. These terms were neglected in order to  
172 focus on the underlying relationship between transversely isotropic elastic parameters and slow  
173 and fast shear waves. This choice enabled us to use a simple, efficient wavelength estimation  
174 method: LFE. LFE-based methods are limited in that information on dissipation is not estimated  
175 without modification (Clayton et al., 2013). In principle, the directionally filtered approach could  
176 be combined with another method such as direct inversion (Oliphant et al., 2001) to estimate  
177 viscoelastic parameters in addition to  $\mu$ ,  $\phi$ , and  $\zeta$ .

### 178 *2.3. Simulation Approach*

179 To evaluate the DFI approach, we created four finite element (FE) simulations in Comsol<sup>TM</sup>  
180 with the four sets of parameters given in Table 1. The parameters in Case 1 were chosen to be  
181 similar to those expected in muscle tissue. Cases 1, 3, and 4 have a fiber orientation optimal for  
182 parameters estimation, while Case 2 has a less favorable fiber orientation. We chose a minimum  
183 tensile anisotropy of  $\zeta = 0$  in Case 3 and a maximum value of tensile anisotropy in Case 4 to  
184 explore the limits of DFI. Figure 5 shows the FE model which corresponds roughly to a motivating  
185 experiment presented by Schmidt et al. (2015b). For each case, the fiber direction is parallel to  
186 the  $xz$ -plane at an angle of  $\beta$  from the  $xy$ -plane. For all cases we used an isotropic loss factor of  
187  $\eta = 0.2$ , which is similar to ranges ( $0.23 < \eta < 0.93$ ) found for the human brain using MRE (Bayly  
188 et al., 2014), ( $0.11 < \eta < 0.23$ ) for gelatin using MRE (Okamoto et al., 2011), and qualitatively  
189 similar in turkey breast ex vivo using MRE (Schmidt et al., 2015a,b).

190 The Young's moduli and Poisson's ratios in the FE simulations were calculated from  $E_1 =$   
191  $\mu(4\zeta + 3)$ ,  $E_2 = E_1/(1 + \zeta)$ ,  $\nu_{12} = 0.49$ ,  $\nu_{21} = \nu_{12}E_2/E_1$ , and  $\nu_{23} = 1 - \nu_{21} - 0.01$ . The cylinder in

192 the simulation had an outer diameter of 47.75 mm, an inner diameter of 3.2 mm, and was 25 mm  
193 thick. The swept mesh was equally spaced with 15 elements along the radius, 48 elements around  
194 the perimeter, and 15 elements along the vertical. The excitation amplitude was  $A = 5 \times 10^{-6}$  m  
195 at a frequency of 200 Hz.

196 We added noise to the FE simulation data of all four cases, which resulted in an SNR of 10, to  
197 the simulation results of all four cases. The SNR is defined using the following relationship

$$\text{SNR} = \frac{A}{\sigma\sqrt{2}}, \quad (5)$$

198 where  $A/\sqrt{2}$  is the RMS of the excitation amplitude and  $\sigma$  is the standard deviation. The normally  
199 distributed noise was added to the total displacement.

### 200 3. Results

201 In this section we compare the material parameter estimates using the DFI method with known  
202 values from the four simulation cases from Table 1. First, slow and fast shear wave speeds are  
203 compared with values calculated analytically from the wave speed equations. Next, local material  
204 parameter estimates are presented for Case 1. Finally, global estimates are compared with the  
205 known values for all four cases.

#### 206 3.1. Wave Propagation Speeds

207 Since the material parameters are known in each simulation, the speed of both shear waves  
208 can be calculated analytically from the material parameters for any propagation direction. This  
209 allows a direct comparison between speed estimates from the DFI process and the analytical values.  
210 Figure 6 shows the comparison for slow and fast shear waves for cases 1, 3, and 4 from Table 1. The

211 estimated wave speeds are the mean values of all selected voxels for each direction. For clarity, wave  
212 speeds are estimated from a total of 32 equally spaced propagation directions within the  $xy$ -plane.

### 213 *3.2. Local Parameter Estimates*

214 The local inversion of the material parameters for the Case 1, which is typical of all four cases, is  
215 shown in Fig. 7. Slices 8 through 17 of the total 24 are shown. A total of 48 propagation directions,  
216 mainly near the  $xy$ -plane as shown in Fig. 5d, were used in the estimation process. Propagation di-  
217 rections near the  $xy$ -plane result in polarization directions with large components in the  $z$ -direction,  
218 which corresponds to the direction of excitation. We selected a fractional amplitude threshold of  
219 0.10, a certainty threshold of 0.25, and a kernel size (radius) of 5 voxels. We accepted estimates for  
220 which  $R > 0.83$  resulting in 33,065 voxels with parameter estimates, which is about 83% of total  
221 number of voxels in the displacement field. The mean values of the estimated parameters and their  
222 standard deviations are given by  $\mu = 986 \pm 56$ ,  $\phi = 0.92 \pm 0.23$ , and  $\zeta = 1.57 \pm 0.23$ . The results  
223 highlight the effect of the typical limited number of directions in a relatively small kernel, which  
224 reduces the accuracy of the inversion. For a homogeneous region, increasing the kernel size to the  
225 total volume will typically give the best results. Great care should be taken in a local approach to  
226 ensure that both slow and fast shear waves of sufficient amplitude (good SNR) in multiple prop-  
227 agation directions are present. Therefore, we have chosen to focus on the global approach in this  
228 paper and have only included results for the local approach for Case 1.

### 229 *3.3. Global Parameter Estimates*

230 For the global inversion, we chose a Monte Carlo approach in which the material properties  
231 at every voxel are assumed to be homogeneous. The same propagation directions and threshold  
232 values used in the local inversion were applied to the global approach for all 4 cases with additive

233 noise. For results without noise, we selected a fractional amplitude threshold of 0.25. For the  
234 Monte Carlo analysis, we picked 100 random wave speed estimates with an equal number of slow  
235 and fast shear wave speeds and repeated this process 1000 times. Estimates were taken from any  
236 voxel and direction remaining after the three selection techniques from Section 2.2 were applied.  
237 For inversions with additive noise, we repeated the Monte Carlo approach with 30 different sets of  
238 noise and averaged the mean and variance of those 30 cases. Table 2 shows the known values, mean  
239 values, and standard deviations of the estimated material parameters for all four cases with and  
240 without additive noise.

#### 241 **4. Discussion**

242 In materials that can be modeled as incompressible and transversely isotropic, two types of shear  
243 wave can exist and their speeds can be used to estimate material parameters. We use simulated  
244 data in this paper to assess the accuracy and reliability of a method based on directional filtering  
245 to estimate parameters of an ITI material. As an intermediate step, analytical and estimated shear  
246 waves speeds are compared in Fig. 6. This figure shows that slow and fast shear waves can be  
247 successfully separated using vector projection onto specific polarization directions and directional  
248 filtering. Estimating the fast shear wave speed is critical if the tensile anisotropy is to be estimated.  
249 For most propagation directions, excellent agreement is found between analytical and estimated  
250 wave speeds.

251 Two important points are highlighted by the few directions in Fig. 6, in which the wave speed  
252 comparison is inexact. First, a sufficiently wide range of propagation directions is crucial for good  
253 material parameter estimates. Such a range of directions could be achieved either by an approach  
254 that includes multiple voxels in each inversion or by adding excitations that induce shear waves with



255 different propagation directions. Second, good selection criteria for determining which wave speed  
256 estimates to include in the inversion process is essential for accurate material parameter estimates.

257 **Local Approach** The capabilities and limitations of the local DFI approach are highlighted  
258 by the inversion results shown in Fig. 7. Valid estimates were found for most of the central voxels,  
259 but could not be found for voxels near the vertical edges on the left and right of the cylinder. For  
260 voxels with valid estimates, there is good agreement between the estimated and known parameters.  
261 More than 99% of  $\mu$  estimates, 93% of  $\phi$  estimates, and 62% of  $\zeta$  estimates are  $\pm 25\%$  from the  
262 known values. For soft tissue, in which properties are difficult to measure, accuracy within 25% is  
263 noteworthy. Voxels in which no estimates were achieved reveals a limitation of the local approach.  
264 Namely, for a given wave field, at certain locations there may be too little information to accurately  
265 estimate all three parameters. Caution should, therefore, be used when taking the local approach.  
266 However, potentially good selection criteria can be used to eliminate a majority of poor estimates  
267 as demonstrated in the presented case.

268 **Global Approach** The results of the global DFI approach in Table 2 indicate that DFI is  
269 quite accurate and not sensitive to the fiber direction or material parameters. Estimated material  
270 parameters are within 25% of the known values for all four cases, with the exception of  $\zeta$  in cases  
271 2 and 4 with noise added and  $\phi$  in case 4 with noise added. For the BCs in the simulation, a  
272 fiber direction of  $\beta = 45^\circ$  from the  $xy$ -plane is optimal for estimating material properties, since  
273 the amplitude of both shear waves will be similar. However, as the fiber direction approaches the  
274  $xy$ -plane, the amplitude of the fast shear wave is also reduced. A fiber direction of  $\beta = 0^\circ$  will result  
275 in only slow shear waves being excited. Case 2, which includes a fiber angle of  $\beta = 15^\circ$  from the

276 plane, is expected to be challenging for DFI, but the accuracy of the material parameter estimates  
277 for this case is similar to the other cases. Accurate estimates were obtained for both large and small  
278 values of tensile anisotropy ratio,  $\zeta$ .

## 279 **5. Summary and Conclusions**

280 Material parameters of soft, anisotropic tissue can be estimated from shear wave measurements  
281 such as those acquired from MRE. The accuracy of DFI was evaluated using simulated data for  
282 both a local and global approach. Using a local approach, good estimates could be found in some  
283 but not all regions of the sample. However, using information from multiple regions in the sample,  
284 very accurate global estimates of all parameters could be obtained. Improvements to the DFI  
285 method could include incorporating more sophisticated selection criteria, and alternative inversion  
286 techniques could improve accuracy in material parameter estimates. Adding multiple experiments  
287 with different modes of excitation or fiber directions to the estimation process should increase the  
288 available information and lead to more accurate estimates especially in the local approach in which  
289 information tends to be more limited than the global approach. Future studies will explore the  
290 estimation of material properties from experimental data.

## 291 **Conflict of Interest Statement**

292 None of the authors has a conflict of interest that could influence the work described in this  
293 manuscript.

294 **Acknowledgments**

295 The authors gratefully acknowledge funding from the NIH from grant no. NS055951 and the  
 296 NSF from grant no. CMMI-1332433.

297 **Appendix A Derivation of Shear Wave Speeds**

298 In this section we derive the equations for both the speed and amplitude polarization of the  
 299 slow and fast shear waves. We begin with the linear elasticity tensor of a four-parameter, nearly  
 300 incompressible, transversely isotropic (NITI) material model from Feng et al. (2013), given in Voigt  
 301 notation as

$$\begin{bmatrix} \sigma_{11} \\ \sigma_{22} \\ \sigma_{33} \\ \sigma_{23} \\ \sigma_{13} \\ \sigma_{12} \end{bmatrix} = \begin{bmatrix} \mathbb{C}_{1111} & \mathbb{C}_{1122} & \mathbb{C}_{1133} & 0 & 0 & 0 \\ \mathbb{C}_{2211} & \mathbb{C}_{2222} & \mathbb{C}_{2233} & 0 & 0 & 0 \\ \mathbb{C}_{3311} & \mathbb{C}_{3322} & \mathbb{C}_{3333} & 0 & 0 & 0 \\ 0 & 0 & 0 & \mathbb{C}_{2323} & 0 & 0 \\ 0 & 0 & 0 & 0 & \mathbb{C}_{1313} & 0 \\ 0 & 0 & 0 & 0 & 0 & \mathbb{C}_{1212} \end{bmatrix} \begin{bmatrix} \epsilon_{11} \\ \epsilon_{22} \\ \epsilon_{33} \\ 2\epsilon_{23} \\ 2\epsilon_{13} \\ 2\epsilon_{12} \end{bmatrix}, \quad (\text{A.1})$$

302 where  $\epsilon$  is the linearized strain from the small strain assumption. In the derivation of the elasticity  
 303 tensor, the fiber direction was assumed to be  $\vec{A} = [1 \ 0 \ 0]^T$  which is in the direction of  $\vec{x}_1$ . The  
 304 plane of symmetry of the ITI material (the 23-plane in Fig. 1) is perpendicular to the fiber direction.  
 305 The terms in Eq.(A.1) are given by

$$\begin{aligned} \mathbb{C}_{1111} &= \kappa + \frac{4}{3}\mu \left(1 + \frac{4}{3}\zeta\right), & \mathbb{C}_{2222} &= \mathbb{C}_{3333} = \kappa + \frac{4}{3}\mu \left(1 + \frac{1}{3}\zeta\right), \\ \mathbb{C}_{1122} &= \mathbb{C}_{2211} = \mathbb{C}_{1133} = \mathbb{C}_{3311} = \kappa - \frac{2}{3}\mu \left(1 + \frac{4}{3}\zeta\right), & \mathbb{C}_{2233} &= \mathbb{C}_{3322} = \kappa - \frac{2}{3}\mu \left(1 - \frac{2}{3}\zeta\right), \\ \mathbb{C}_{2323} &= \mu, \text{ and} & \mathbb{C}_{1313} &= \mathbb{C}_{1212} = \mu(1 + \phi), \end{aligned} \quad (\text{A.2})$$

306 where  $\mu$  is the substrate shear modulus,  $\kappa$  is the bulk modulus,  $\phi$  is the shear anisotropy, and  $\zeta$  is  
307 the tensile anisotropy (Feng et al., 2013). This stiffness matrix satisfies the symmetry requirements  
308 for any linear, elastic transversely isotropic material, or if  $\phi$  and  $\zeta$  are zero, an isotropic, linear  
309 elastic material. For a nearly incompressible material, it is instructive to examine the compliance  
310 tensor, which is the inverse of the elasticity tensor  $\mathbb{C}^{-1} = \mathbb{S}$ . In this case the compliance tensor is  
311 given in Voigt notation by

$$\mathbb{S} = \begin{bmatrix} \frac{1}{\mu(4\zeta+3)} + \frac{1}{9\kappa} & \frac{-1}{2\mu(4\zeta+3)} + \frac{1}{9\kappa} & \frac{-1}{2\mu(4\zeta+3)} + \frac{1}{9\kappa} & 0 & 0 & 0 \\ \frac{-1}{2\mu(4\zeta+3)} + \frac{1}{9\kappa} & \frac{1+\zeta}{\mu(4\zeta+3)} + \frac{1}{9\kappa} & \frac{-(1+2\zeta)}{2\mu(4\zeta+3)} + \frac{1}{9\kappa} & 0 & 0 & 0 \\ \frac{-1}{2\mu(4\zeta+3)} + \frac{1}{9\kappa} & \frac{-(1+2\zeta)}{2\mu(4\zeta+3)} + \frac{1}{9\kappa} & \frac{1+\zeta}{\mu(4\zeta+3)} + \frac{1}{9\kappa} & 0 & 0 & 0 \\ 0 & 0 & 0 & \frac{1}{\mu} & 0 & 0 \\ 0 & 0 & 0 & 0 & \frac{1}{\mu(1+\phi)} & 0 \\ 0 & 0 & 0 & 0 & 0 & \frac{1}{\mu(1+\phi)} \end{bmatrix}. \quad (\text{A.3})$$

312 Note that as the ratio  $\kappa/\mu$  increases, the effect of the bulk modulus on the compliance tensor, becomes  
313 negligible. In contrast, elements of the stiffness tensor approach infinity for an incompressible  
314 material. Once the incompressible assumption is made, we take a similar approach as Royer et al.  
315 (2011) and Rouze et al. (2013) to find the Young's moduli  $E$ , shear moduli  $\mu$ , and Poisson's  $\nu$  ratios:

$$\begin{aligned} E_1 &= \mu(4\zeta + 3), & E_2 &= \frac{\mu(4\zeta + 3)}{1 + \zeta}, \\ \mu_1 &= \mu(1 + \phi), & \mu_2 &= \mu, \\ \nu_{12} &= \frac{1}{2}, & \nu_{21} &= \frac{1}{2(1 + \zeta)}, & \text{and} & \nu_{23} &= \frac{1 + 2\zeta}{2(1 + \zeta)}, \end{aligned} \quad (\text{A.4})$$

316 where the coordinate system and fiber direction are defined by Fig. 1.

317 For the case of elastic, plane waves traveling in the four-parameter NITI material, the assumed  
318 solution

$$\vec{u}(\vec{x}, t) = u_0 \vec{m} \exp [i(k\vec{n} \cdot \vec{x} - \omega t)] \quad (\text{A.5})$$

319 satisfies the equation of motion (EOM)

$$\operatorname{div} \boldsymbol{\sigma} = \rho \frac{\partial^2 \vec{u}}{\partial t^2}, \quad (\text{A.6})$$

320 where  $\boldsymbol{\sigma}$  is a second order stress tensor,  $\operatorname{div}$  is the divergence,  $u_0$  is the amplitude of the displacement,  
 321  $t$  is time,  $\vec{m} = [m_1 \ m_2 \ m_3]^\top$  is the polarization direction of the displacement,  $\vec{n} = [n_1 \ n_2 \ n_3]^\top$   
 322 is the propagation direction,  $k$  is the wavenumber,  $\omega$  is the excitation frequency, and  $\rho$  is the  
 323 density (Holzapfel, 2000, pp. 144-145). Substituting the assumed solution into the EOM results in  
 324 the eigenvalue problem:

$$\mathbf{Q}(\vec{n}) \cdot \vec{m} = \rho c^2 \vec{m}, \quad (\text{A.7})$$

325 where  $\mathbf{Q}$  is the acoustic tensor and  $c$  is the wave speed. The solution to the eigenvalue problem  
 326 defines three eigenvalues  $\lambda = \rho c^2$  and eigenvectors  $\vec{m}$ .

327 Without loss of generality, we can specify that the propagation direction remains in the 12-plane  
 328 (see Fig. (1)) and can be defined by  $\vec{n} = [\cos \theta \ \sin \theta \ 0]^\top$ . Substituting  $\vec{n}$  from the 12-plane and  
 329 the elastic tensor terms from Eq. A.2 gives the acoustic tensor the form of

$$\mathbf{Q} = \begin{bmatrix} (\kappa + \frac{4\mu}{3} + \frac{16\mu\zeta}{9})\mathbf{c}^2 + \mu(1 + \phi)\mathbf{s}^2 & (\kappa + \frac{\mu}{3} + \mu\phi - \frac{8\mu\zeta}{9})\mathbf{c}\mathbf{s} & 0 \\ (\kappa + \frac{\mu}{3} + \mu\phi - \frac{8\mu\zeta}{9})\mathbf{c}\mathbf{s} & (\kappa + \frac{4\mu}{3} + \frac{4\mu\zeta}{9})\mathbf{s}^2 + \mu(1 + \phi)\mathbf{c}^2 & 0 \\ 0 & 0 & \mu(1 + \phi)\mathbf{c}^2 + \mu\mathbf{s}^2 \end{bmatrix}, \quad (\text{A.8})$$

330 where  $\mathbf{c} = \cos \theta$  and  $\mathbf{s} = \sin \theta$ . For a given set of material properties, the eigenvalue problem from  
 331 Eq.(A.7) can now be solved numerically. For an incompressible material where the limit of  $\kappa \rightarrow \infty$   
 332 is taken, an analytical form of the eigenvalues is given by

$$\lambda_1 = \rho c_s^2 = \mu(1 + \phi \cos^2 \theta), \quad (\text{A.9a})$$

$$\lambda_2 = \rho c_f^2 = \mu(1 + \phi \cos^2(2\theta) + \zeta \sin^2(2\theta)), \quad \text{and} \quad (\text{A.9b})$$

$$\lambda_3 = \rho c_p^2 \rightarrow \infty, \quad (\text{A.9c})$$

333 where  $c_s$  is the slow shear wave speed,  $c_f$  is the fast shear wave speed, and  $c_p$  is the pressure wave  
 334 speed. The eigenvectors are given by

$$\begin{aligned} \vec{v}_1 &= [0 \quad 0 \quad 1]^\top, \\ \vec{v}_2 &= [-\sin \theta \quad \cos \theta \quad 0]^\top, \quad \text{and} \\ \vec{v}_3 &= [\cos \theta \quad \sin \theta \quad 0]^\top, \end{aligned} \quad (\text{A.10})$$

335 and are not dependent on the value of the bulk modulus. In general, the fiber and propagation  
 336 directions will be in arbitrary directions, and the slow  $\vec{m}_s$  and fast  $\vec{m}_f$  shear wave polarization  
 337 directions are

$$\vec{m}_s = \vec{n} \times \vec{a} = -\vec{v}_1, \quad \text{and} \quad (\text{A.11a})$$

$$\vec{m}_f = \vec{n} \times \vec{m}_s = \vec{v}_2. \quad (\text{A.11b})$$

338

## 339 **Appendix B Weighted Least Squares Approach**

340 Material parameters can be estimated using weighted least squares (WLS) from Eq. (2), Eq. (4),  
 341 and the wave speed. This section follows the same approach used by Tweten et al. (2015). We start  
 342 with the typical least squares equation

$$\mathbf{H}\vec{x} = \vec{y}, \quad (\text{B.1})$$

343 where  $\mathbf{H}$  is the observation matrix,  $\vec{x}$  is a vector containing the parameters to be estimated, and  
 344  $\vec{y}$  is a vector containing the measurements. The wave speed equations (Eq. 2 and Eq. 4) for both  
 345 wave modes can be written in the form of Eq. (B.1) as

$$\begin{bmatrix} 1 & \cos^2 \theta_1 & 0 \\ \vdots & \vdots & \vdots \\ 1 & \cos^2 \theta_M & 0 \\ 1 & \cos^2 2\theta_1 & \sin^2 2\theta_1 \\ \vdots & \vdots & \vdots \\ 1 & \cos^2 2\theta_N & \sin^2 2\theta_N \end{bmatrix} \begin{bmatrix} \mu \\ \mu\phi \\ \mu\zeta \end{bmatrix} = \rho \begin{bmatrix} c_{s,1}^2 \\ \vdots \\ c_{s,M}^2 \\ c_{f,1}^2 \\ \vdots \\ c_{f,N}^2 \end{bmatrix}, \quad (\text{B.2})$$

346 where  $\theta_1$  is the angle between the propagation direction  $\vec{n}_1$  and the fiber direction,  $c_{s,1}$  and  $c_{f,1}$   
 347 are the slow and fast shear wave speeds in the propagation direction  $\vec{n}_1$ , respectively, and M and  
 348 N are the total number slow and fast wave speed estimates, respectively. Each row in Eq. (B.2)  
 349 comes from a different voxel (repeated for slow and fast shear waves), and the total number of rows  
 350 corresponds to twice the number of voxels in the kernel for the local approach or twice the number  
 351 of voxels in the volume for the global approach. At least three rows are required, and at least two  
 352 different angles  $\theta$  are required for a valid estimate.

353 The material parameters can be estimated using the WLS equation

$$\tilde{x} = (\mathbf{H}^T \mathbf{W} \mathbf{H})^{-1} \mathbf{H}^T \mathbf{W} \vec{y}, \quad (\text{B.3})$$

354 where  $\tilde{x}$  is a vector of the estimated material parameters and  $\mathbf{W}$  is the weighting matrix. The weights  
 355 used in this paper are the relative displacement amplitudes at each voxel for a given propagation  
 356 direction and polarization.

357 **References**

- 358 Bayly, P., Clayton, E., Genin, G., Okamoto, R., 2014. Magnetic resonance elastography of the  
359 brain, in: Neu, C., Genin, G. (Eds.), Handbook of Imaging in Biological Mechanics. CRC Press,  
360 New York.
- 361 Clayton, E., Garbow, J., Bayly, P., 2011. Frequency-dependent viscoelastic parameters of mouse  
362 brain tissue estimated by MR elastography. *Phys Med Biol* 56, 2391–2405. doi:10.1088/0031-  
363 9155/56/8/005.
- 364 Clayton, E., Okamoto, R., Bayly, P., 2013. Mechanical properties of viscoelastic media by lo-  
365 cal frequency estimation of divergence-free wave fields. *J Biomed Eng* 135, 0210251–0210256.  
366 doi:10.1115/1.4023433.
- 367 Feng, Y., Okamoto, R., Namani, R., Genin, G., Bayly, P., 2013. Measurements of mechanical  
368 anisotropy in brain tissue and implications for transversely isotropic material models of white  
369 matter. *J Mech Behav Biomed* 23, 117 – 132. doi:http://dx.doi.org/10.1016/j.jmbbm.2013.04.007.
- 370 Green, M., Bilston, L., Sinkus, R., 2008. In vivo brain viscoelastic properties measured by magnetic  
371 resonance elastography. *NMR Biomed* 21, 755–764. doi:10.1002/nbm.1254.
- 372 Guo, J., Hirsch, S., Scheel, M., Braun, J., Sack, I., 2015. Three-parameter shear wave inversion in  
373 MR elastography of incompressible transverse isotropic media: Application to in vivo lower leg  
374 muscles. *Magn Reson Med* doi:10.1002/mrm.25740.
- 375 Holzapfel, G., 2000. Nonlinear solid mechanics: a continuum approach for engineering. John Wiley  
376 & Sons, Inc., New York.



377 Kingsbury, N., 2001. Complex wavelets for shift invariant analysis and filtering of signals. Appl  
378 Comput Harmon A 10, 234–253. doi:10.1006/acha.2000.0343.

379 Klatt, D., Friedrich, C., Korth, Y., Vogt, R., Braun, J., Sack, I., 2010a. Viscoelastic properties  
380 of liver measured by oscillatory rheometry and multifrequency magnetic resonance elastography.  
381 Biorheology 47, 133–141. doi:10.3233/BIR-2010-0565.

382 Klatt, D., Papazoglou, S., Braun, J., Sack, I., 2010b. Viscoelasticity-based MR elastography of  
383 skeletal muscle. Phys Med Biol 55, 6445–6459. doi:10.1088/0031-9155/55/21/007.

384 Knutsson, H., Westin, C.F., Granlund, G., 1994. Local multiscale frequency and bandwidth esti-  
385 mation, in: Image Processing, 1994. Proc. ICIP-94, pp. 36–40. doi:10.1109/ICIP.1994.413270.

386 Manduca, A., Lake, D., Kruse, S., Ehman, R., 2003. Spatio-temporal directional filtering for  
387 improved inversion of MR elastography images. Med Image Anal 7, 465–473. doi:10.1016/S1361-  
388 8415(03)00038-0.

389 Namani, R., Bayly, P., 2009. Shear wave propagation in anisotropic soft tissues and gels, in:  
390 Engineering in Medicine and Biology Society, 2009. EMBC 2009. Annual International Conference  
391 of the IEEE, pp. 1117–1122. doi:10.1109/IEMBS.2009.5333418.

392 Okamoto, R., Clayton, E., Bayly, P., 2011. Viscoelastic properties of soft gels: comparison of  
393 magnetic resonance elastography and dynamic shear testing in the shear wave regime. Phys Med  
394 Biol 56, 6379.

395 Okamoto, R., Johnson, C., Feng, Y., Georgiadis, J., Bayly, P., 2014. MRE detection of heterogeneity  
396 using quantitative measures of residual error and uncertainty, in: Proc. SPIE 9038, Med Imaging,  
397 p. 90381E. doi:10.1117/12.2044633.

398 Oliphant, T., Manduca, A., Ehman, R., Greenleaf, J., 2001. Complex-valued stiffness reconstruction  
399 for magnetic resonance elastography by algebraic inversion of the differential equation. *Magn*  
400 *Reson Med* 45, 299–310. doi:10.1002/1522-2594(200102)45:2;299::AID-MRM1039;3.0.CO;2-O.

401 Papazoglou, S., Rump, J., Braun, J., Sack, I., 2006. Shear wave group velocity inversion in MR  
402 elastography of human skeletal muscle. *Magn Reson Med* 56, 489–497. doi:10.1002/mrm.20993.

403 Qin, E.C., Sinkus, R., Geng, G., Cheng, S., Green, M., Rae, C.D., Bilston, L.E., 2013. Combin-  
404 ing MR elastography and diffusion tensor imaging for the assessment of anisotropic mechanical  
405 properties: A phantom study. *JMRI-J Magn Reson Im* 37, 217–226. doi:10.1002/jmri.23797.

406 Romano, A., Abraham, P., Rossman, P., Bucaro, J., Ehman, R., 2005. Determination and analysis  
407 of guided wave propagation using magnetic resonance elastography. *Magn Reson Med* 54, 893–  
408 900. doi:10.1002/mrm.20607.

409 Romano, A., Scheel, M., Hirsch, S., Braun, J., Sack, I., 2012. In vivo waveguide elastography of  
410 white matter tracts in the human brain. *Magn Reson Med* 68, 1410–1422. doi:10.1002/mrm.24141.

411 Rouze, N., Wanga, M., Palmeria, M., Nightingale, K., 2013. Finite element modeling of impulsive  
412 excitation and shear wave propagation in an incompressible, transversely isotropic medium. *J*  
413 *Biomech* 46, 2761–2768. doi:10.1016/j.jbiomech.2013.09.008.

414 Royer, D., Gennisson, J., Defieux, T., Tanter, M., 2011. On the elasticity of transverse isotropic  
415 soft tissues. *J Acoust Soc Am* 129, 2757–2760. doi:10.1121/1.3559681.

416 Schmidt, J., Tweten, D., Mahoney, M., Portnoi, T., Okamoto, R., Garbow, J., Bayly, P., 2015a.  
417 Experimental measurement of shear and tensile moduli in anisotropic tissue using magnetic res-  
418 onance elastography, in: *Proc. SB3C*.

419 Schmidt, J., Tweten, D., Mahoney, M., Portnoi, T., Okamoto, R., Garbow, J., Bayly, P., 2015b.  
420 Magnetic resonance elastography of slow and fast shear waves illuminates differences in shear and  
421 tensile moduli in anisotropic tissue, in: Proc. ISMRM.

422 Sinkus, R., Tanter, M., Catheline, S., Lorenzen, J., Kuhl, C., Sondermann, E., Fink, M., 2005.  
423 Imaging anisotropic and viscous properties of breast tissue by magnetic resonance-elastography.  
424 *Magn Reson Med* 53, 372–387. doi:10.1002/mrm.20355.

425 Tweten, D., Okamoto, R., Schmidt, J., Garbow, J., Bayly, P., 2015. Identification of anisotropic  
426 material parameters in elastic tissue using magnetic resonance imaging of shear waves, in: Proc.  
427 27th ASME VIB, Boston.

Table 1: The material properties for all four finite element simulations, where  $\rho$  is the density,  $\mu$  is the substrate shear modulus,  $\phi$  is the shear anisotropy, and  $\zeta$  is the tensile anisotropy. The angle between the  $xy$ -plane and the fiber orientation is given by  $\beta$ .

|        | $\rho$ [kg/m <sup>3</sup> ] | $\mu$ [Pa] | $\phi$ | $\zeta$ | $\beta$ |
|--------|-----------------------------|------------|--------|---------|---------|
| Case 1 | 1000                        | 1000       | 1      | 2       | 45°     |
| Case 2 | 1000                        | 1000       | 1      | 2       | 15°     |
| Case 3 | 1000                        | 1000       | 2      | 0       | 45°     |
| Case 4 | 1000                        | 1000       | 0.5    | 4       | 45°     |

Table 2: Global material parameter estimates and their standard deviations for the four cases from Table 1 using a Monte Carlo approach to DFI. For simulations without noise (SNR= $\infty$ ), all estimated material parameters are within 25% of the known values. For the cases with additive noise (SNR=10), most estimated material parameters are within 25% of the known values, except for  $\zeta$  in cases 2 and 4 and  $\phi$  in case 3, which are within 40% of the known values.

|         | Case 1 |                 |                 | Case 2 |                 |                 |
|---------|--------|-----------------|-----------------|--------|-----------------|-----------------|
|         | Actual | SNR= $\infty$   | SNR=10          | Actual | SNR= $\infty$   | SNR=10          |
| $\mu$   | 1000   | 1040 $\pm$ 21   | 994 $\pm$ 25    | 1000   | 1030 $\pm$ 36   | 980 $\pm$ 37    |
| $\phi$  | 1      | 1.04 $\pm$ 0.07 | 0.91 $\pm$ 0.08 | 1      | 1.02 $\pm$ 0.09 | 0.95 $\pm$ 0.10 |
| $\zeta$ | 2      | 1.76 $\pm$ 0.06 | 1.51 $\pm$ 0.08 | 2      | 1.60 $\pm$ 0.10 | 1.21 $\pm$ 0.10 |

  

|         | Case 3 |                 |                 | Case 4 |                 |                 |
|---------|--------|-----------------|-----------------|--------|-----------------|-----------------|
|         | Actual | SNR= $\infty$   | SNR=10          | Actual | SNR= $\infty$   | SNR=10          |
| $\mu$   | 1000   | 1050 $\pm$ 23   | 996 $\pm$ 25    | 1000   | 1040 $\pm$ 20   | 986 $\pm$ 27    |
| $\phi$  | 2      | 1.53 $\pm$ 0.08 | 1.32 $\pm$ 0.09 | 0.5    | 0.59 $\pm$ 0.06 | 0.60 $\pm$ 0.08 |
| $\zeta$ | 0      | 0.00 $\pm$ 0.04 | 0.01 $\pm$ 0.04 | 4      | 3.10 $\pm$ 0.11 | 2.47 $\pm$ 0.11 |

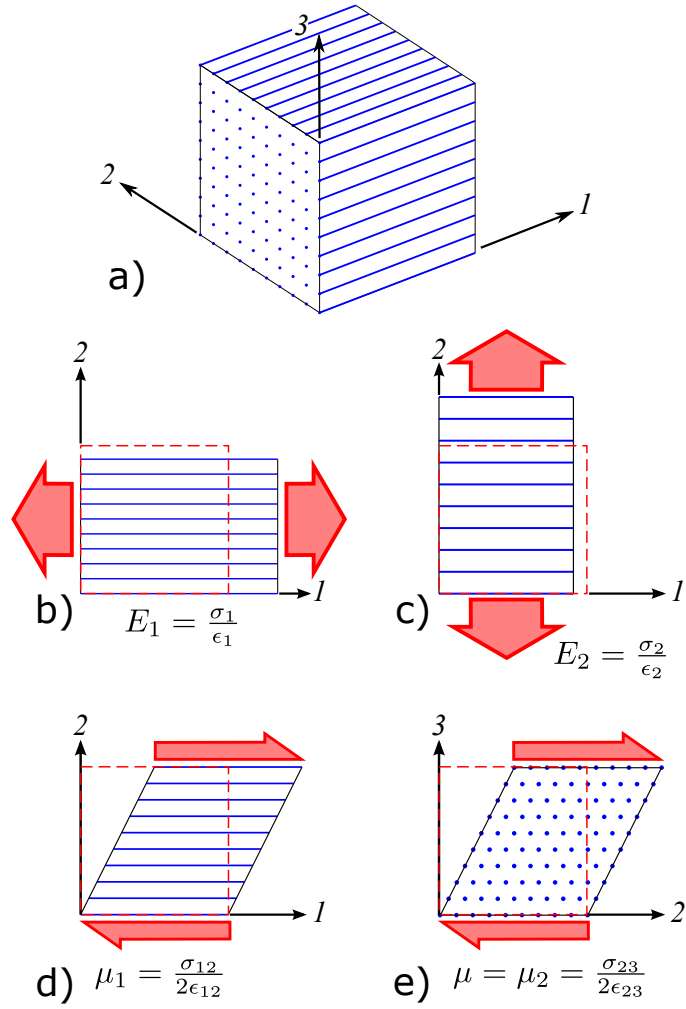

Figure 1: a) Transversely isotropic material with fiber reinforcement. Tensile moduli in directions b) parallel and c) perpendicular to the fibers are given by  $E_1$  and  $E_2$ , respectively. Shear moduli in planes d) parallel and c) perpendicular to the fibers are given by  $\mu_1$  and  $\mu$ , respectively. The 13-plane (not shown) has the same shear and tensile properties as the 12-plane. The dashed boxes indicate the undeformed case.

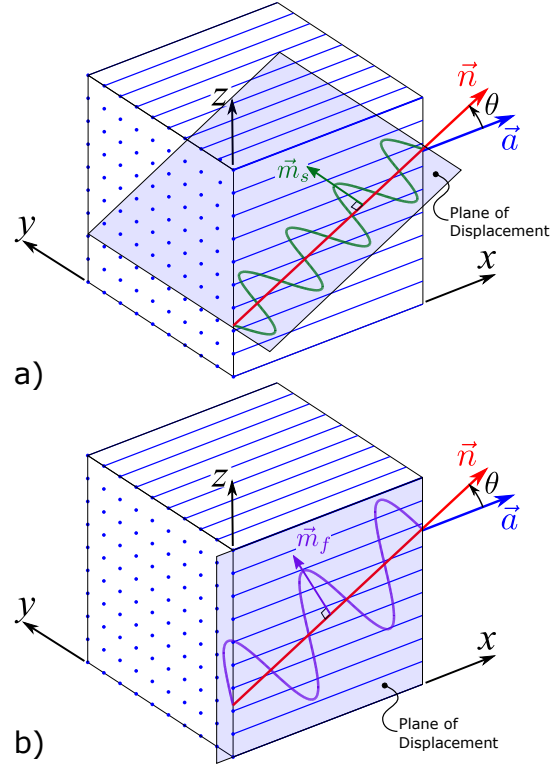

Figure 2: A displacement field with a single propagation direction,  $\vec{n}$ , at an angle  $\theta$  from the fiber direction,  $\vec{a}$ , can be decomposed into two shear waves, (a) “slow” and (b) “fast” with different polarization directions. This is illustrated for the case in which the fiber direction is aligned with the  $x$ -axis. (a) The displacements of the slow shear wave are in the  $\vec{m}_s$  polarization direction which lies in the shaded plane. (b) The displacements of the fast shear wave are in the  $\vec{m}_f$  polarization direction which lies in the shaded  $(xz)$  plane. Note that the wavelength of the fast shear waves is longer than that of the slow shear wave for the same frequency.

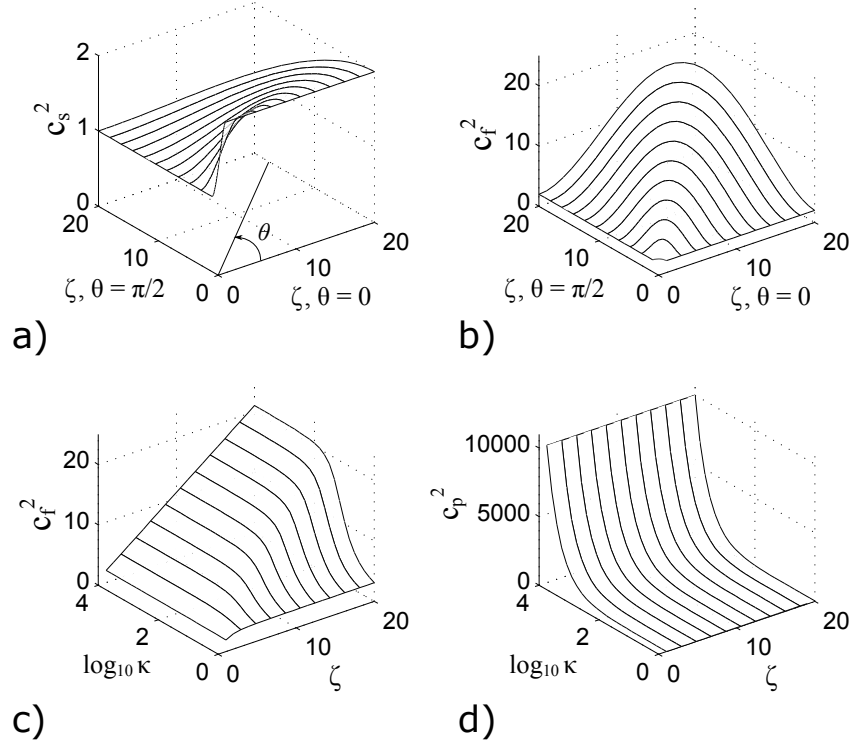

Figure 3: The effect of tensile modulus  $\zeta$  and propagation direction  $\theta$  on the a) slow  $c_s$  and b) fast  $c_f$  shear speeds is shown ( $\mu = \rho = \phi = 1$  and  $\kappa \rightarrow \infty$ ). The tensile modulus increases along a radius from the origin with an angle  $\theta$  from the  $\theta = 0$  axis. An increase in  $\zeta$  increases  $c_f$ , but has no effect on  $c_s$ . The effects of  $\zeta$  and bulk modulus  $\kappa$  on the c) fast shear speed and d) pressure wave speed  $c_p$  are shown ( $\mu = \rho = \phi = 1$  and  $\theta = 135^\circ$ ). The fast shear speed approaches a constant value for finite  $\kappa$ .



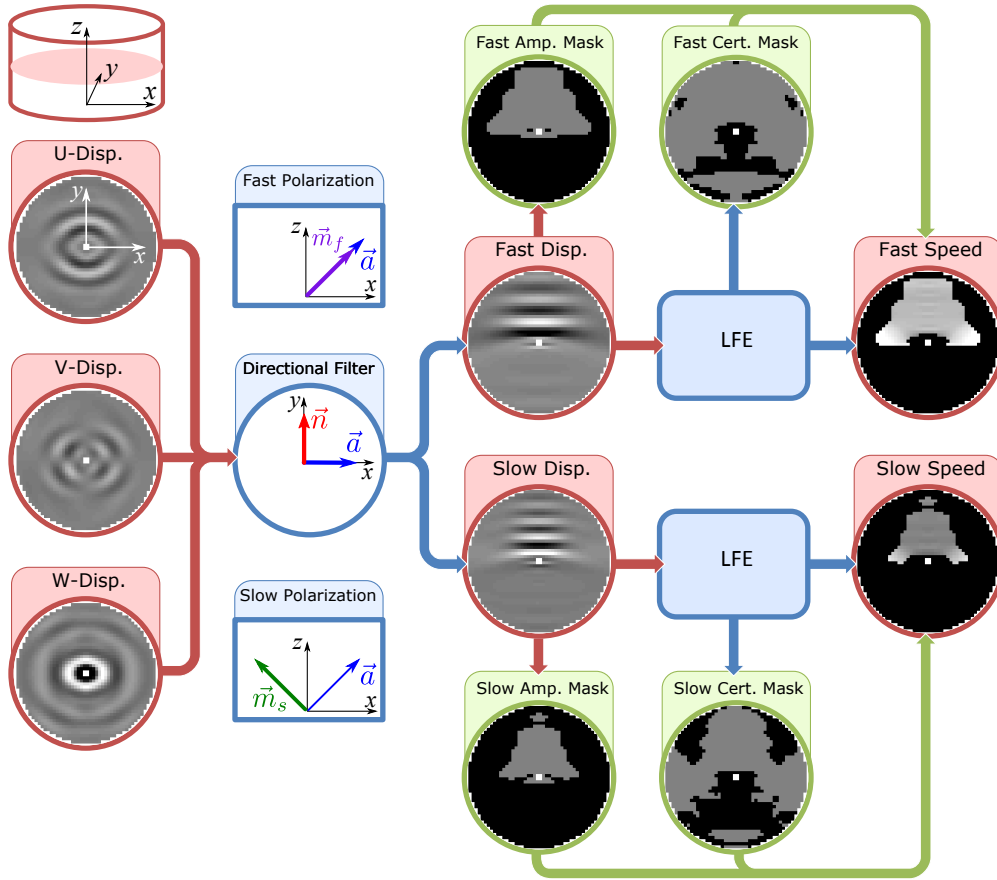

Figure 4: The process of estimating the shear wave speed for DFI begins with the 3D displacement field. The data displayed in this figure is from the cylindrical simulation shown in Fig. 5. All slices are shown in the  $xy$ -plane with the slice location and coordinate system indicated in the upper left hand corner of this figure. The U, V, and W displacement fields are in the  $x$ ,  $y$ , and  $z$  directions, respectively. The total displacement field is decomposed into slow and fast shear waves and directionally filtered using the propagation and polarization directions shown, resulting in slow and fast shear wave displacement fields for each direction. Next, wave speeds are estimated from the slow and fast shear wave displacement fields using LFE. Inclusion criteria using an amplitude threshold and certainty threshold result in amplitude and certainty masks, respectively for both the slow and fast shear waves. These amplitude and certainty masks are applied to the speed estimates resulting in the slow and fast shear wave speed estimates shown at the end of the process. Outlier wave speeds ( $> 1$  standard deviation from the mean) are not included in the subsequent parameter fitting step.

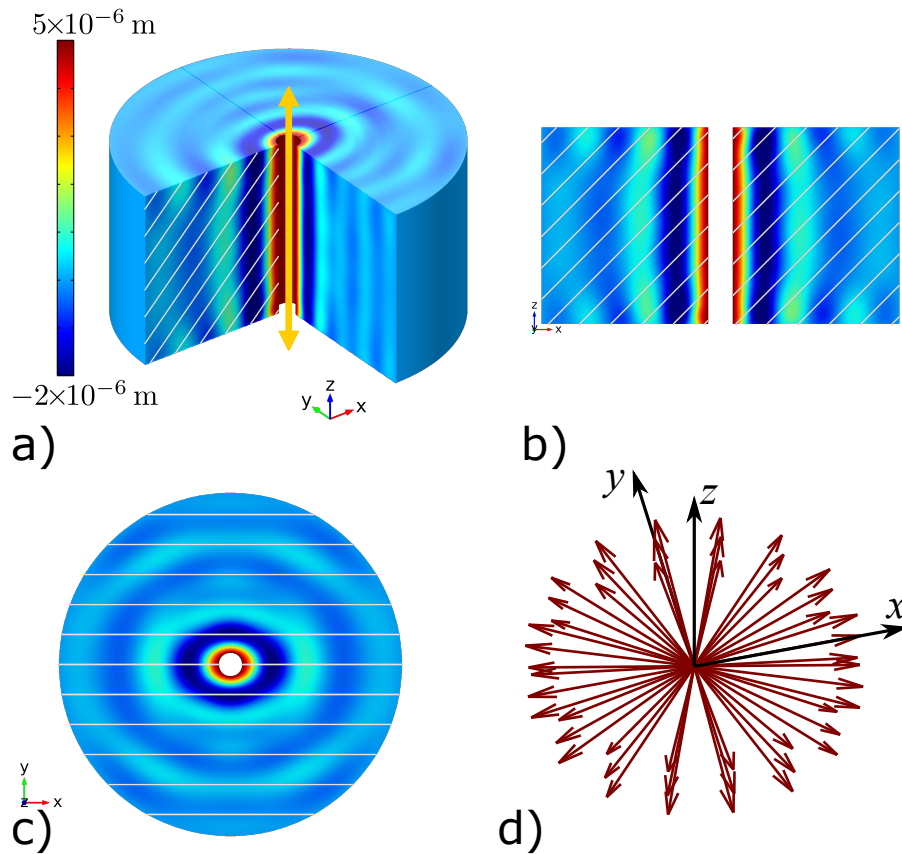

Figure 5: Finite element (Comsol<sup>TM</sup>) simulation of Case 1 with displacement in the  $z$ -direction shown. The location and direction of excitation is shown by the arrow in a), and the resulting propagation is shown in both the b)  $xz$ -plane and c)  $xy$ -plane. The lines indicate fiber direction. Note that the wavelength is longer in the direction parallel to planes containing the fibers. For all cases, the boundary conditions (BCs) include a  $5 \mu\text{m}$  excitation at 200 Hz on the inner boundary radius = 1.6 mm; fixed displacement on the outer boundary radius = 23 mm; and free displacement on the top and bottom faces. For all cases, the output data was discretized to simulated images with “field of view” of  $48 \times 48 \times 24 \text{ mm}^3$  with a  $1 \text{ mm}^3$  voxel size. d) Propagation direction vector set used for the local and global inversion approaches.

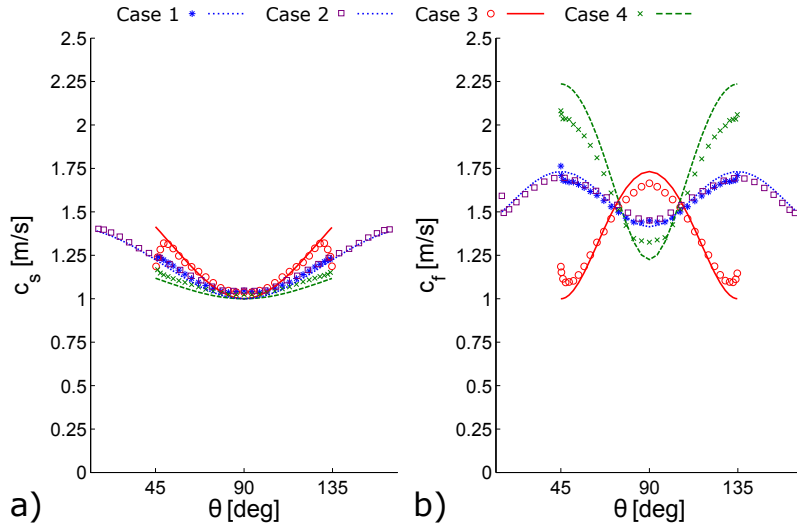

Figure 6: Analytical propagation speeds (lines) and mean estimated propagation speeds from simulation (symbols) of a) slow and b) fast shear waves. Parameters for Case 1 (dotted line, \* symbols), Case 2 (dotted line,  $\square$  symbols), Case 3 (solid line, o symbols), and Case 4 (dashed line, x symbols) are given in Table 1. Mean wave speed estimates are calculated by averaging voxel estimates for each direction using the process outlined in Fig. 4. Note that Cases 1 and 2 have the same theoretical curve, but Case 2 has a wider range of angles,  $\theta$ .

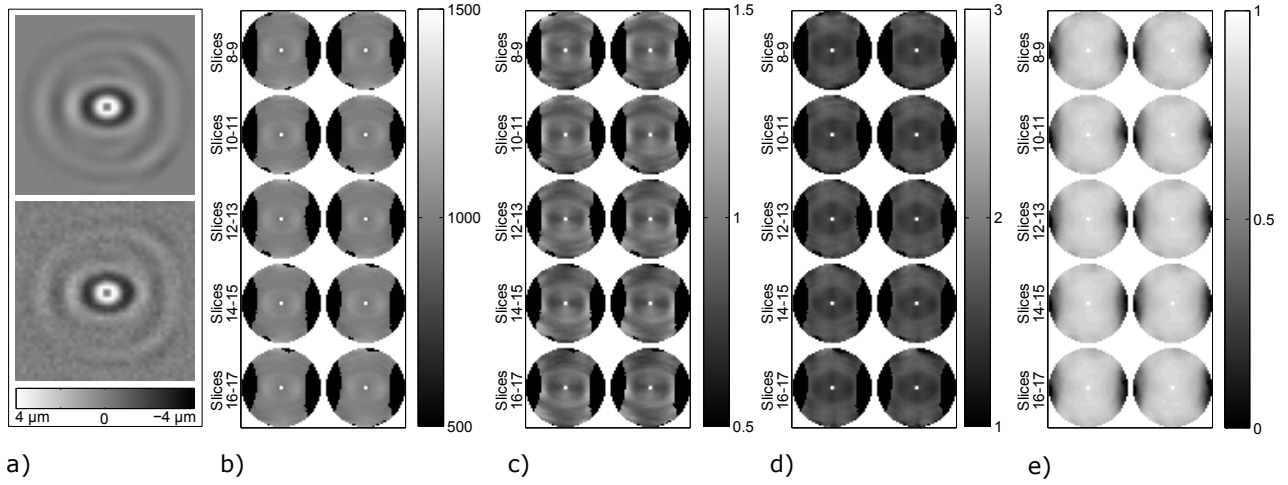

Figure 7: Local estimates of parameter values for Case 1 (see Table 1) with added noise (SNR=10) using DFI. a) W-displacement field of slice 12 without noise (SNR=  $\infty$ ) above and with noise (SNR=10) below. The b) shear modulus ( $\mu_{\text{sim}} = 1000$  Pa), c) shear anisotropy ( $\phi_{\text{sim}} = 1$ ), d) tensile anisotropy ( $\zeta_{\text{sim}} = 2$ ), and e)  $R^2$  are shown for slices 8 through 17. For the parameters  $\mu$ ,  $\phi$ , and  $\zeta$ , the range shown is  $\pm 50\%$  of the true values (this range contains 98% of all estimated values). The full range is shown for  $R^2$ .

Figure 01  
[Click here to download Figure: box.eps](#)

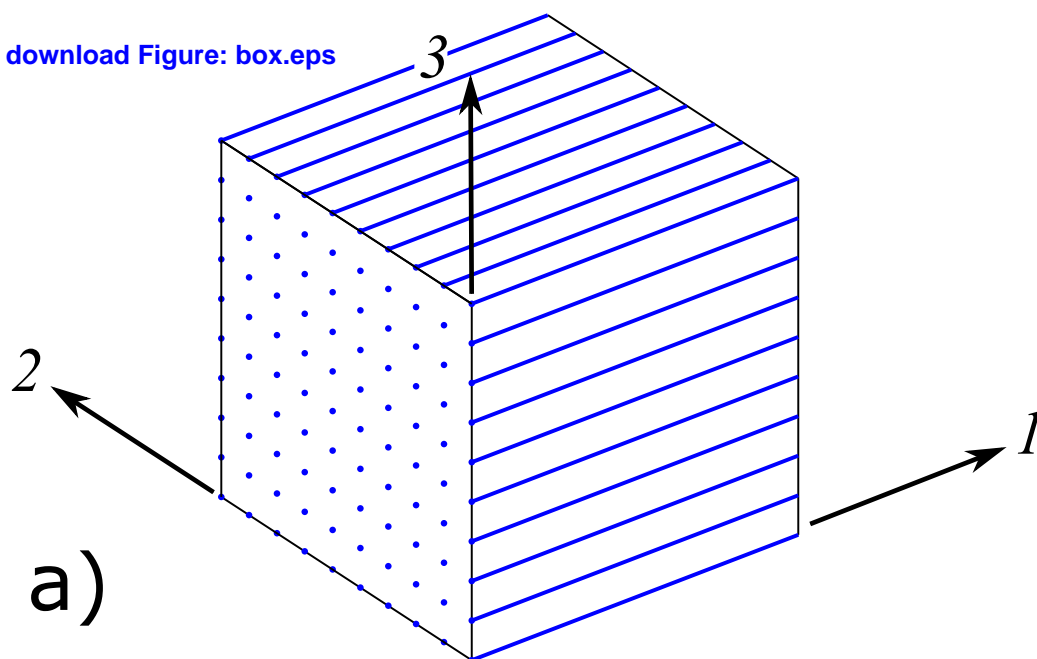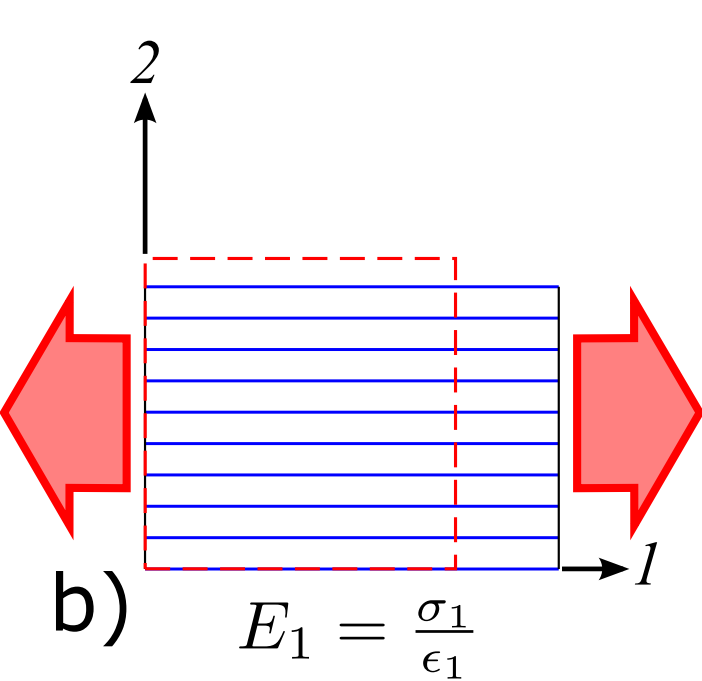

$$E_1 = \frac{\sigma_1}{\epsilon_1}$$

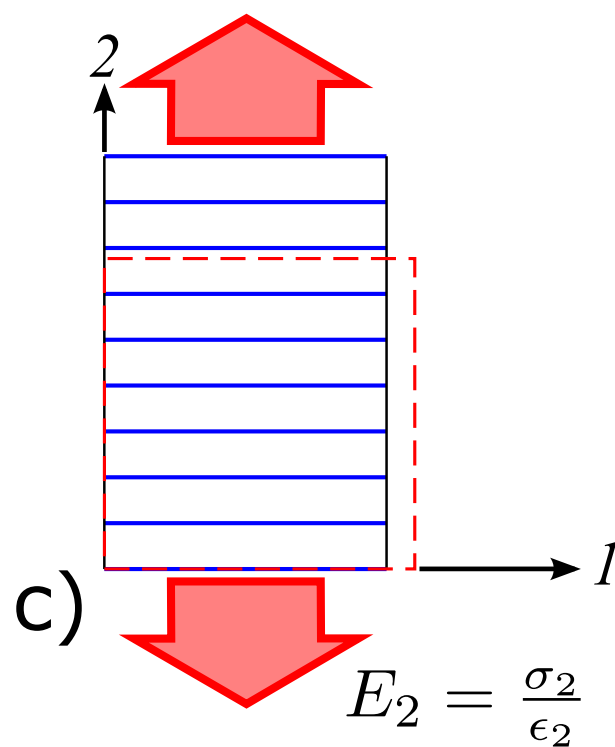

$$E_2 = \frac{\sigma_2}{\epsilon_2}$$

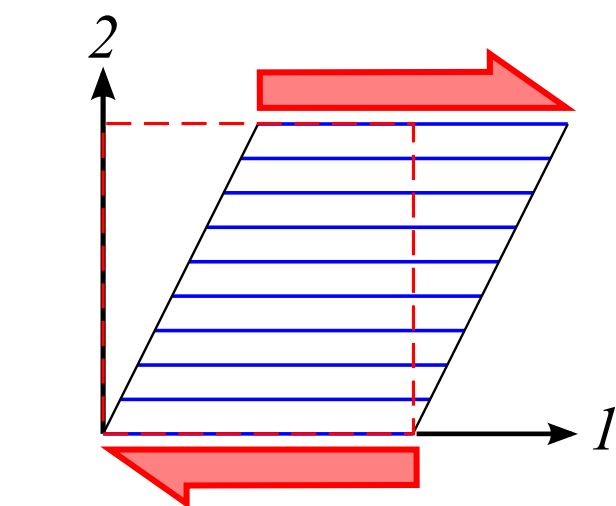

$$\mu_1 = \frac{\sigma_{12}}{2\epsilon_{12}}$$

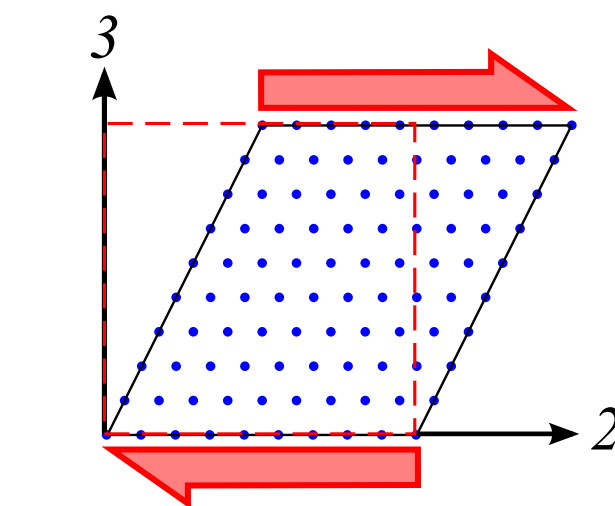

$$\mu = \mu_2 = \frac{\sigma_{23}}{2\epsilon_{23}}$$

Figure 02  
Click here to download Figure: box\_wave.eps

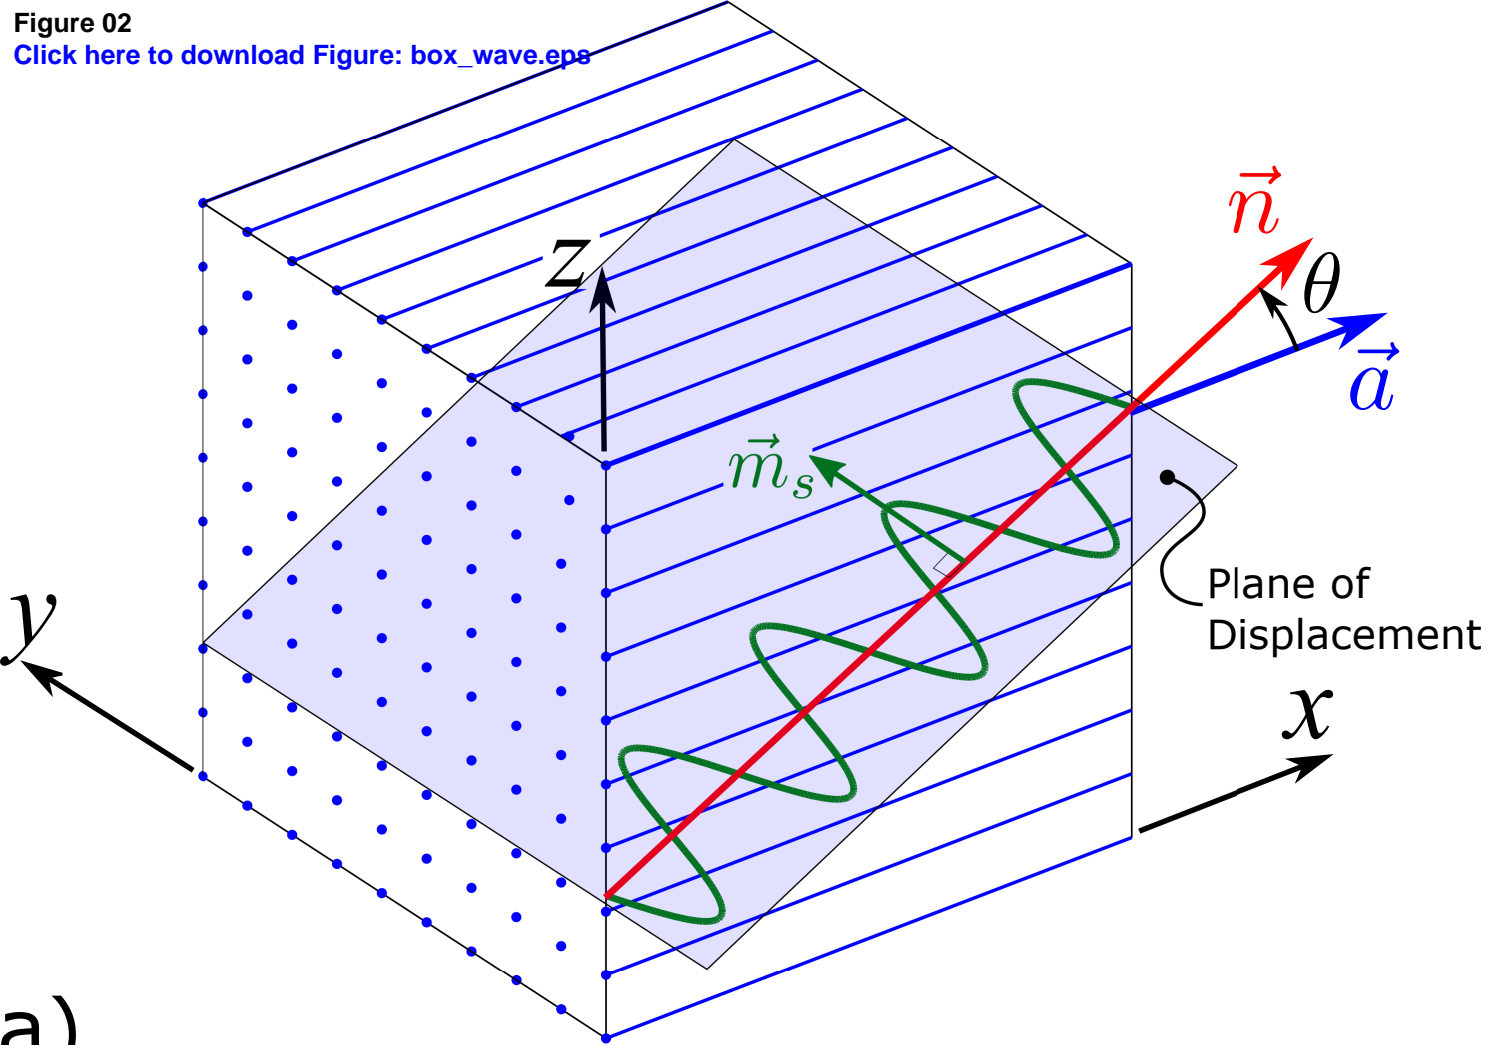

a)

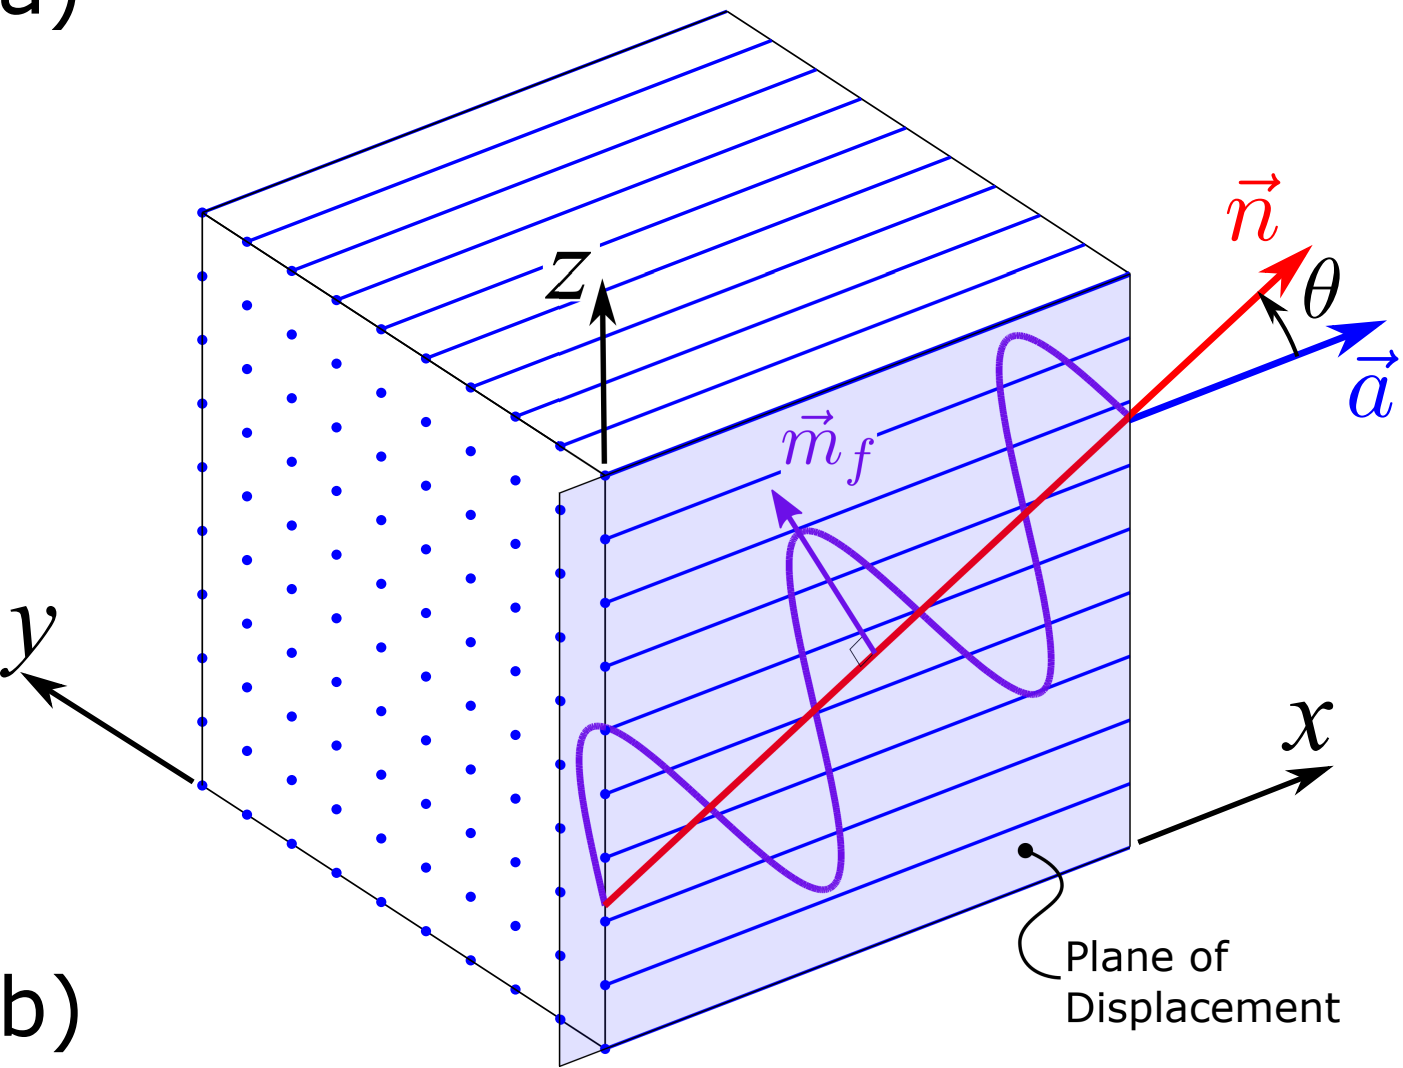

b)

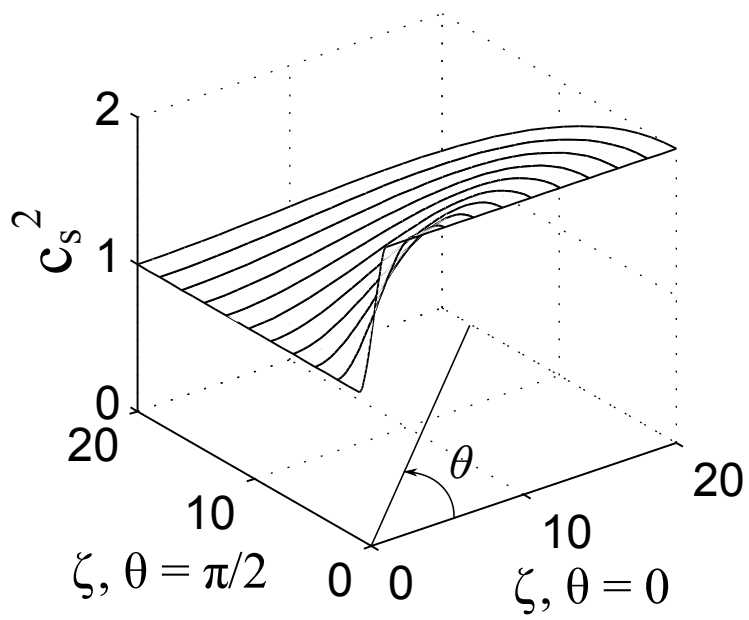

a)

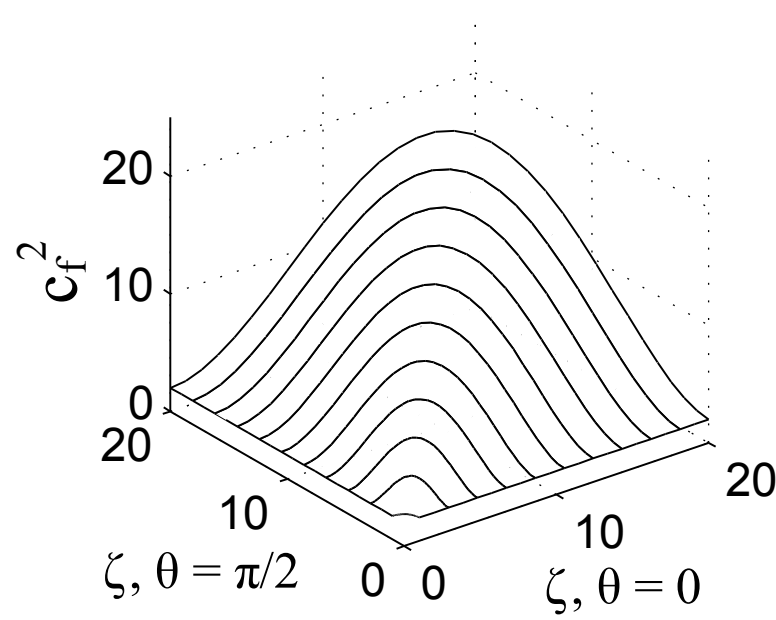

b)

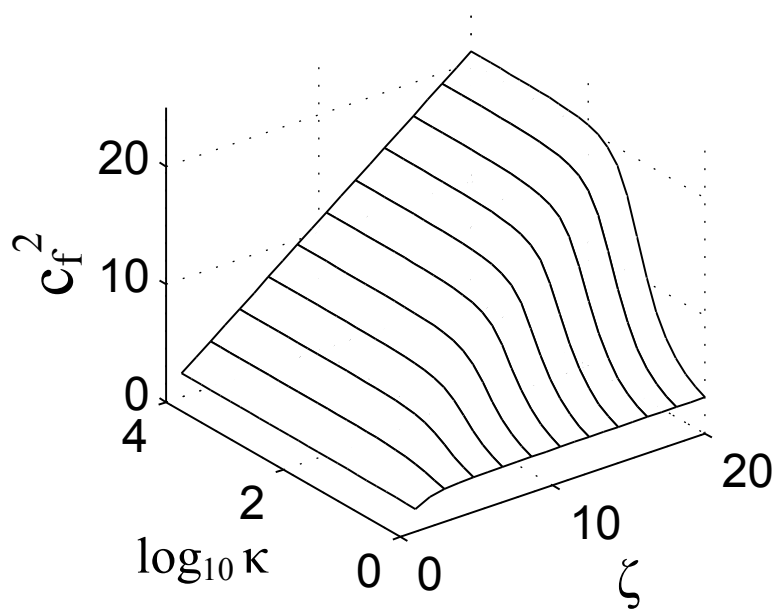

c)

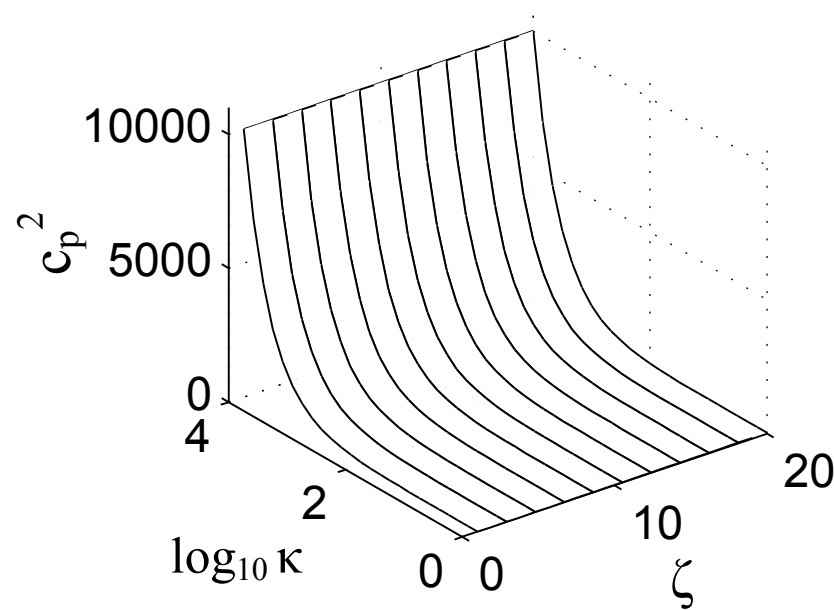

d)

Figure 04  
[Click here to download Figure: process.eps](#)

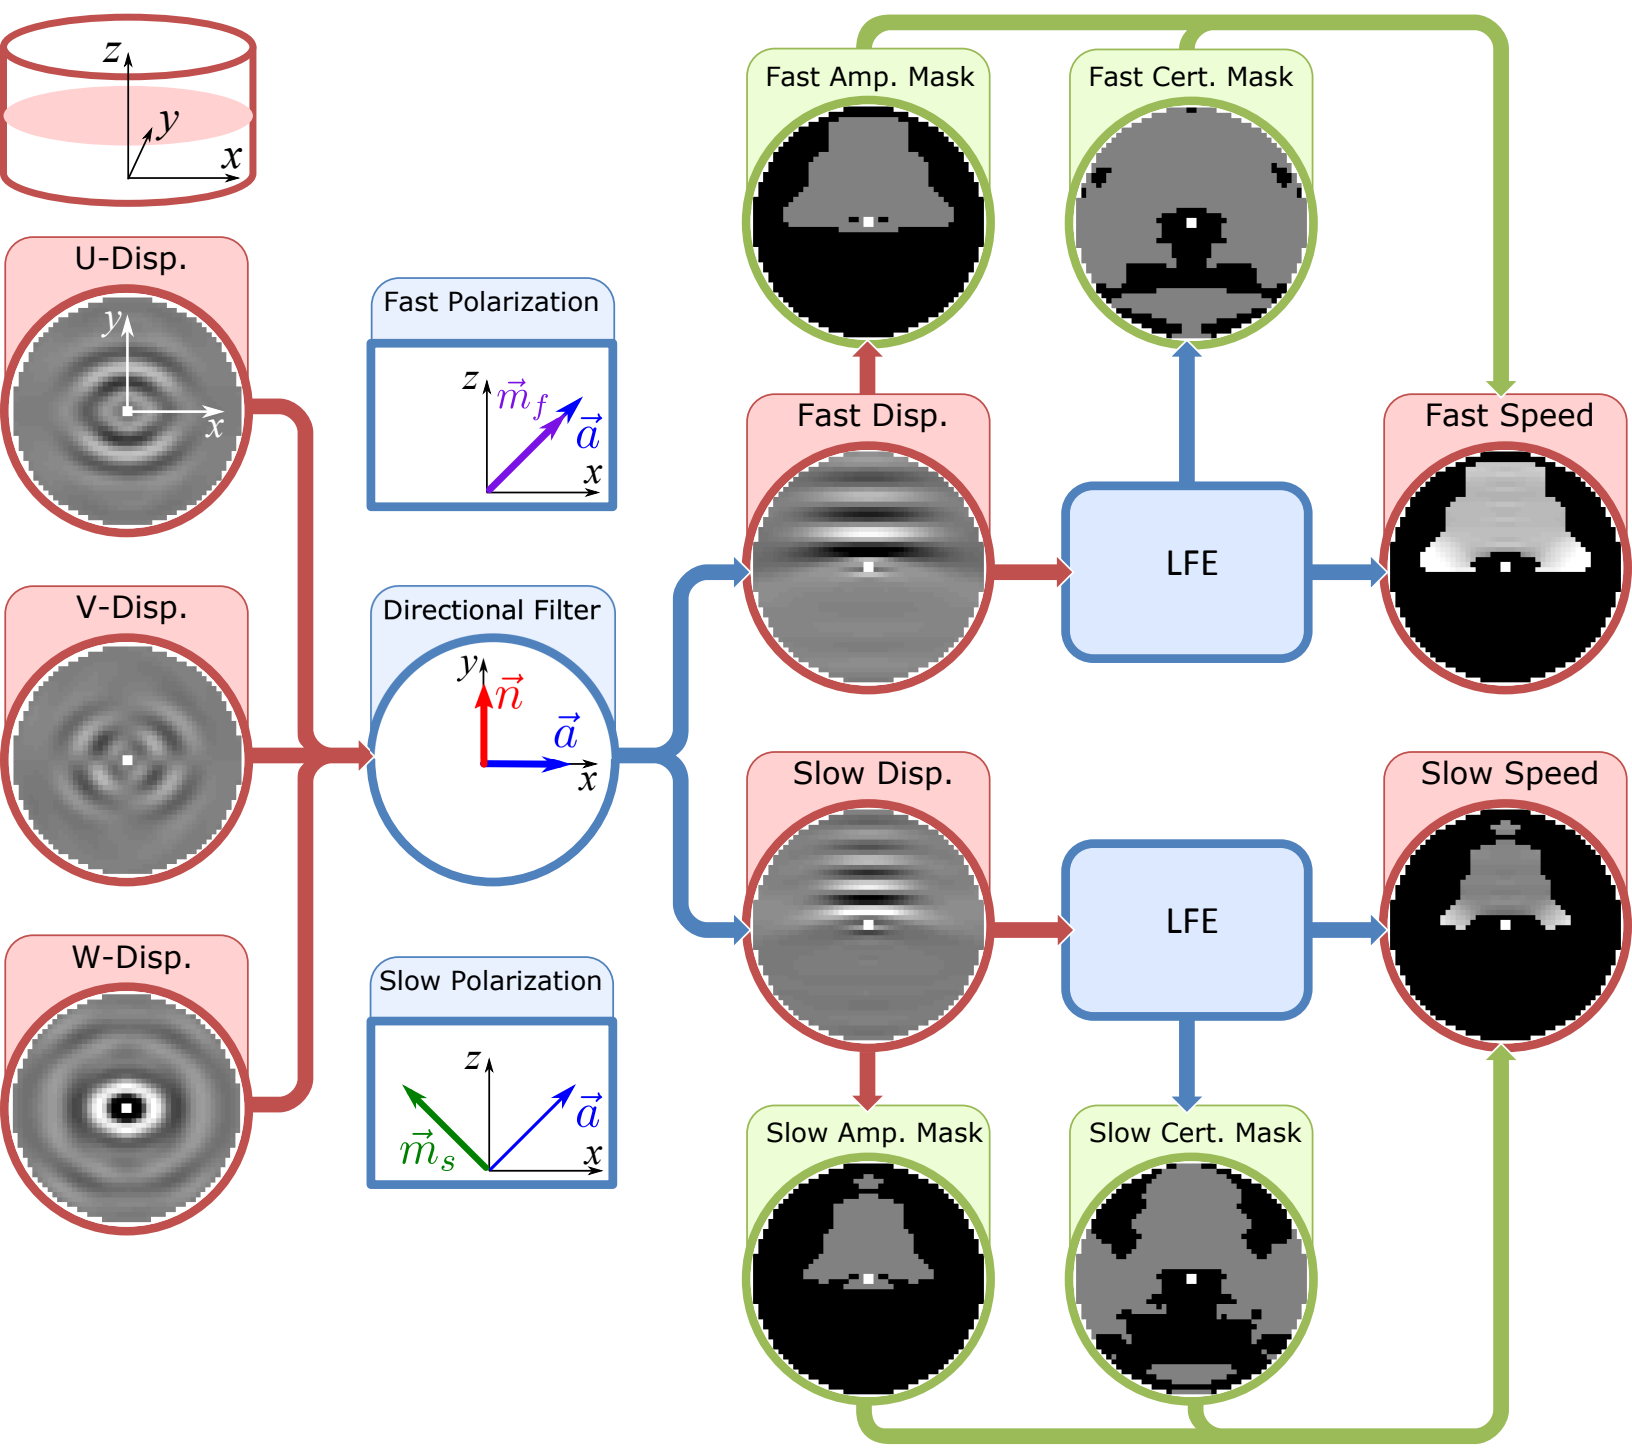



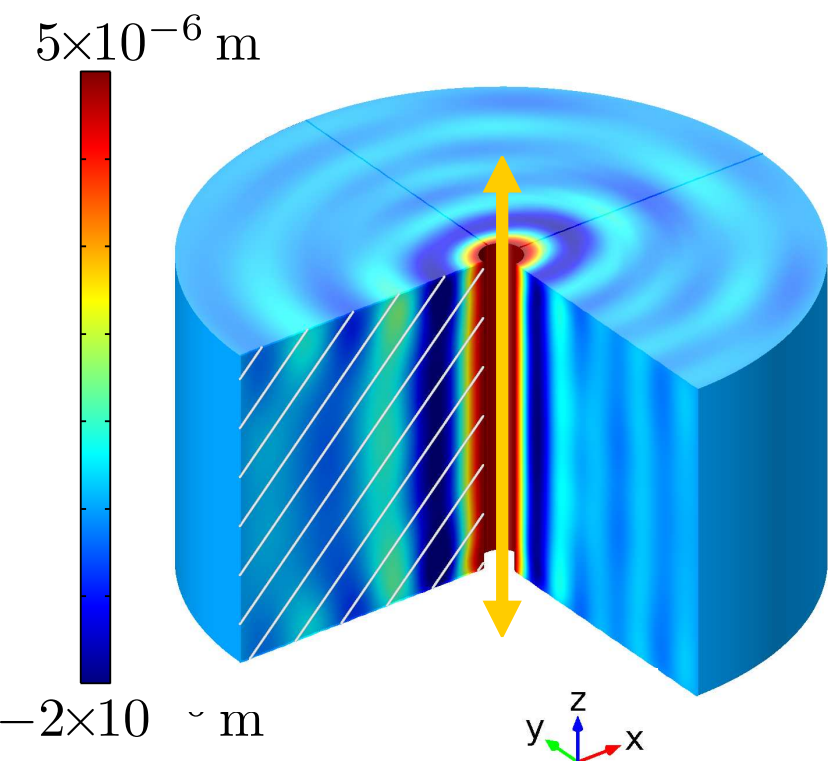

a)

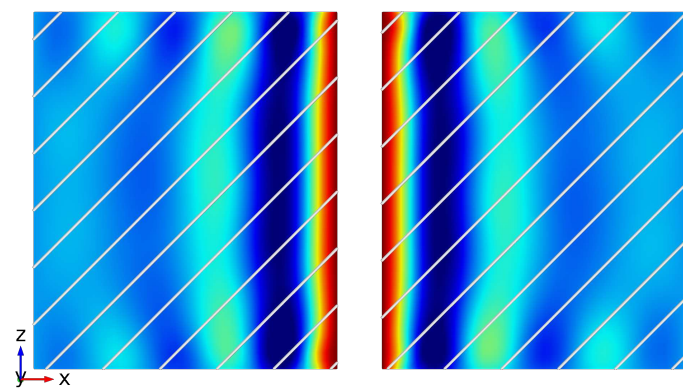

b)

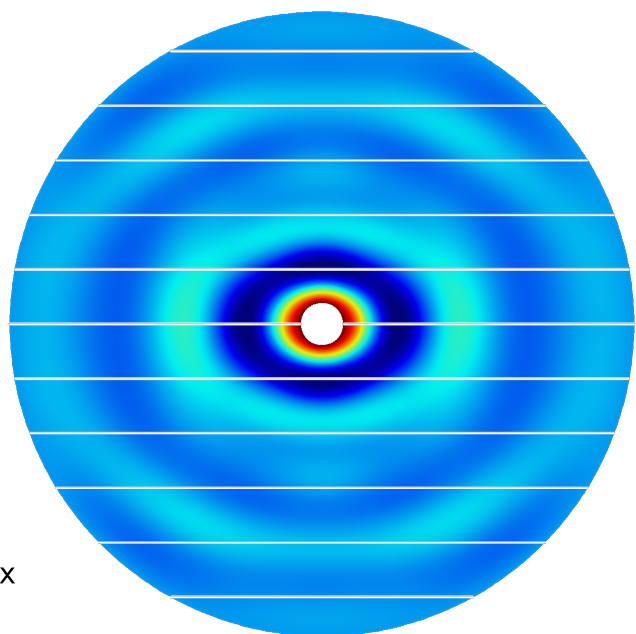

c)

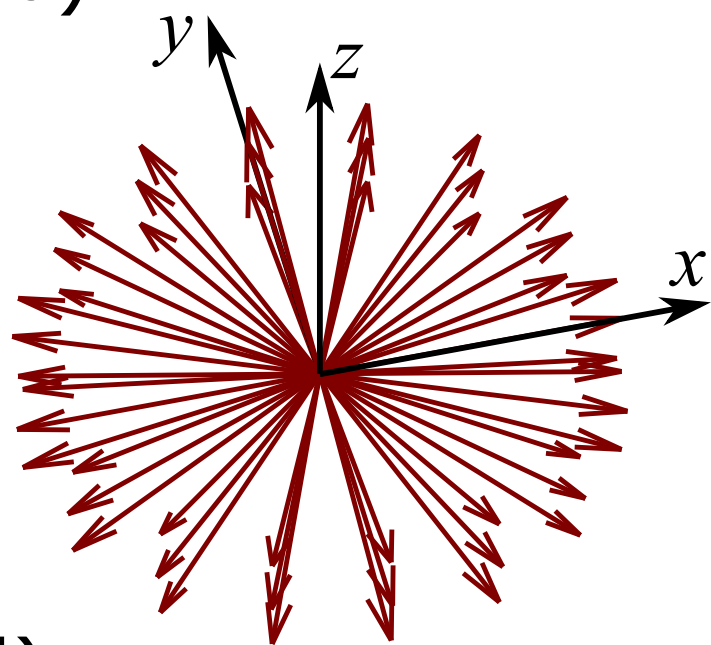

d)

Figure 06  
[Click here to download Figure: wavespeed\\_compare.eps](#)

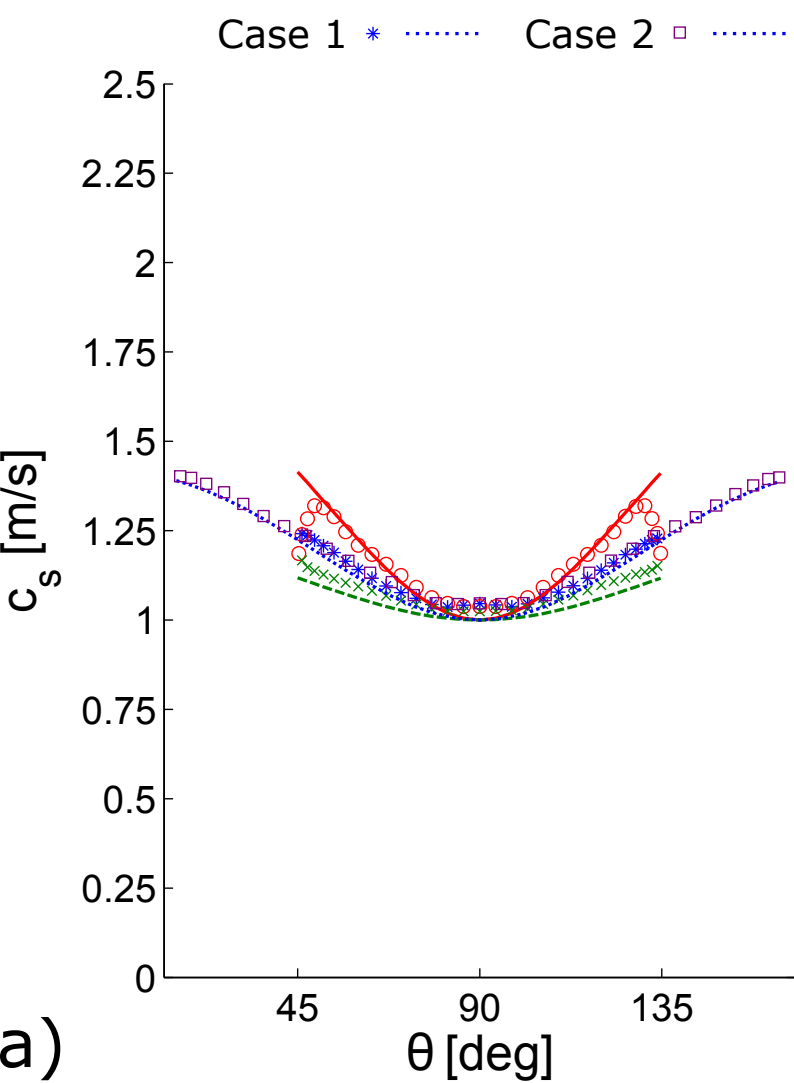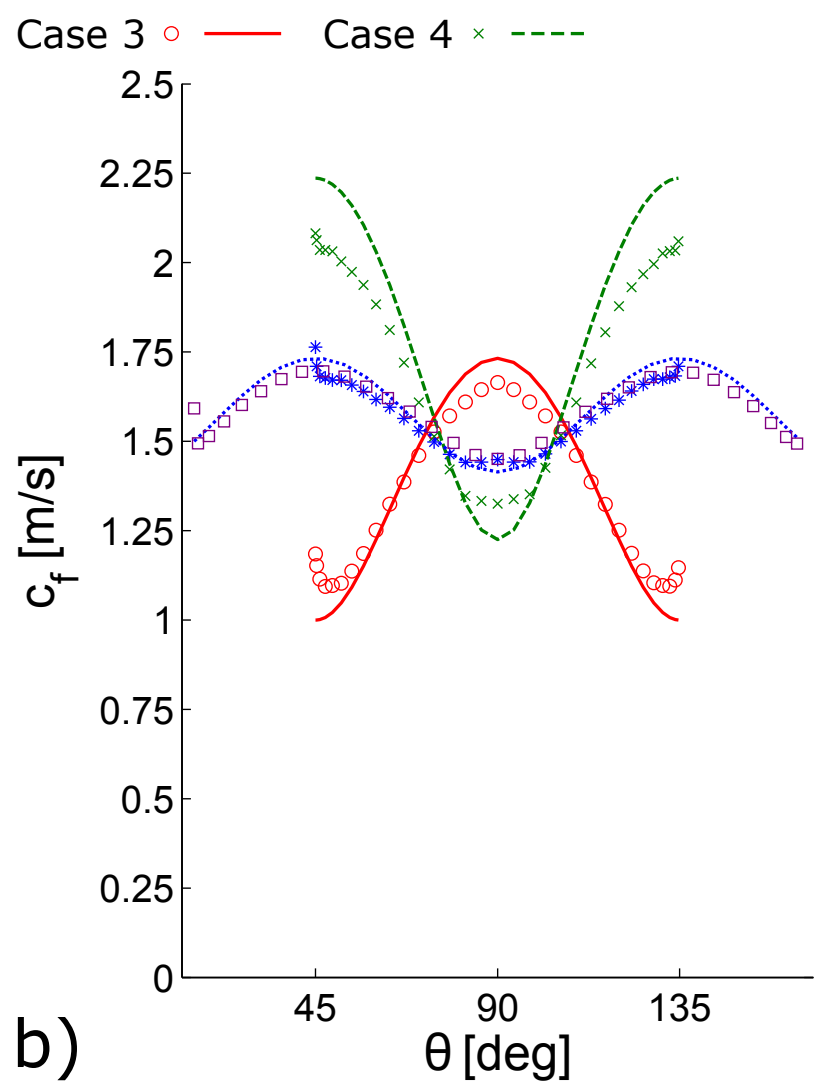

Figure 07  
[Click here to download Figure: param\\_compare.eps](#)

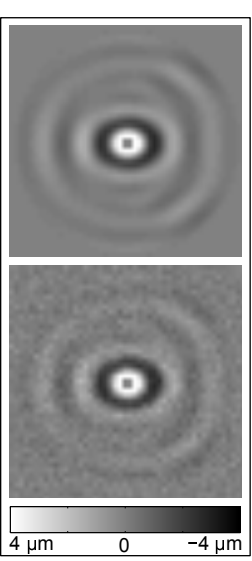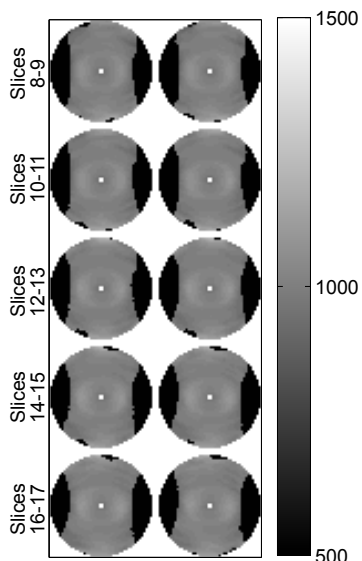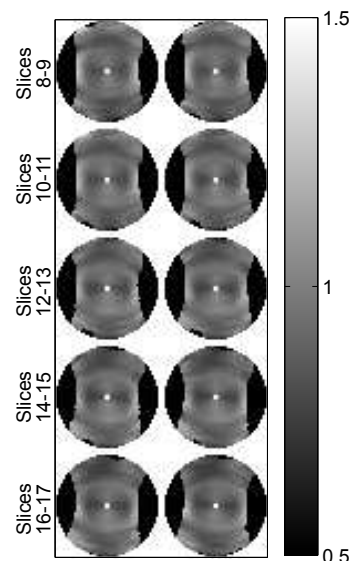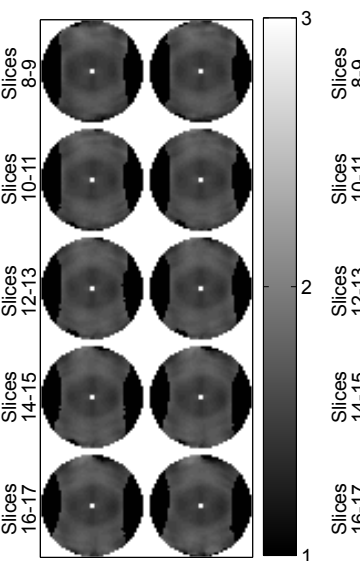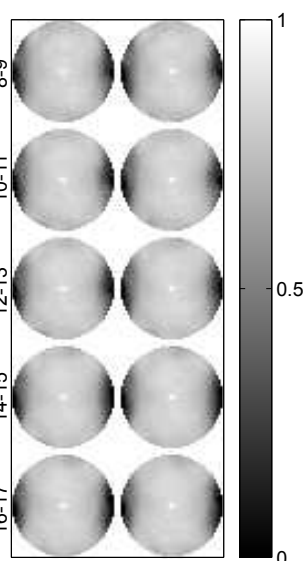

a)

b)

c)

d)

e)

## Conflict of Interest Statement

We declare that we have no financial or personal relationships with other people or organizations that could inappropriately influence (bias) our work.

Dennis J. Tweten

Ruth J. Okamoto

John L. Schmidt

Joel R. Garbow

Philip V. Bayly

**LaTeX Source Files**

[Click here to download LaTeX Source Files: TwetenLaTeXSource.tex](#)

**LaTeX Source Files**

**[Click here to download LaTeX Source Files: mybibfile.bib](#)**
